# Supplementary material for: Refined design of a DNA logic gate for implementing a DNA-based three-level circuit
Source: Royal Society of Chemistry journal article supplement (doi:10.1039/d4nr03606a), 2024-11-06
Supplement: d4nr03606a1.xlsx [file d4nr03606a1.xlsx]

## Sheet: Figure 2c
Time(h:mm:ss)	T° 485/20,528/20	A=n, B=n			A=0, B=0	A=0, B=0	A=0, B=0	A=0, B=1	A=0, B=1	A=0, B=1	A=1, B=0	A=1, B=0	A=1, B=0	A=1, B=1	A=1, B=1	A=1, B=1
00:00:00	36.9	8403	8392	8426	9985	9994	9898	11133	11139	11031	10244	10238	10327	10960	10968	10901
00:01:00	36.9	8444	8476	8488	10318	10281	10208	11910	11887	11794	10892	10914	10989	11790	11756	11710
00:02:00	37	8572	8541	8585	10950	11005	10886	13056	13090	12968	11662	11629	11732	13167	13217	13129
00:03:00	37	8577	8601	8617	11761	11767	11672	14550	14534	14437	12539	12599	12655	14738	14770	14691
00:04:00	37	8610	8586	8626	12854	12814	12742	16405	16405	16300	13703	13654	13765	16387	16423	16342
00:05:00	37	8539	8560	8578	14455	14463	14367	18710	18699	18600	15301	15320	15397	18603	18553	18515
00:06:00	37	8512	8487	8528	16602	16569	16494	21441	21417	21324	17599	17549	17660	22026	21961	21931
00:07:00	37	8432	8467	8478	19070	19086	18986	24391	24429	24305	20505	20509	20593	26872	26864	26805
00:08:00	37	8496	8478	8515	21576	21588	21490	27372	27327	27245	23778	23782	23866	32698	32726	32649
00:09:00	36.9	8490	8471	8509	23845	23835	23748	30110	30150	30025	26980	26996	27074	38935	38912	38861
00:10:00	36.9	8409	8445	8455	25674	25731	25611	32370	32409	32285	29800	29823	29898	45099	45114	45044
00:11:00	36.9	8470	8452	8489	27111	27058	26993	34132	34084	34003	32148	32126	32223	50689	50756	50660
00:12:00	36.9	8465	8449	8485	28242	28266	28162	35615	35607	35506	34005	34033	34105	55462	55432	55384
00:13:00	36.9	8399	8433	8444	29190	29185	29096	36780	36853	36712	35413	35411	35498	59514	59515	59452
00:14:00	36.9	8469	8452	8489	29922	29926	29832	37713	37607	37555	36485	36459	36558	63029	63023	62963
00:15:00	37	8476	8468	8500	30551	30536	30452	38410	38504	38352	37319	37350	37421	65977	65981	65916
00:16:00	36.9	8416	8416	8444	31094	31111	31011	38985	38944	38860	37974	37958	38052	68281	68339	68247
00:17:00	36.9	8381	8411	8424	31622	31574	31506	39442	39423	39328	38524	38513	38605	70193	70090	70079
00:18:00	37	8465	8425	8473	31936	32049	31901	39926	39955	39836	39049	39056	39139	71824	71905	71802
00:19:00	37	8415	8444	8458	32245	32096	32079	40353	40333	40238	39482	39494	39574	73321	73248	73222
00:20:00	37	8443	8421	8460	32456	32591	32432	40670	40685	40573	39832	39812	39908	74441	74525	74420
00:21:00	37	8423	8450	8465	32767	32669	32626	40917	40907	40807	40124	40137	40217	75341	75290	75253
00:22:00	36.9	8480	8451	8494	33004	33042	32931	41033	41073	40948	40328	40358	40429	76077	76078	76015
00:23:00	37	8426	8444	8463	33264	33277	33179	41242	41143	41088	40608	40518	40649	76831	76829	76767
00:24:00	37	8406	8391	8427	33412	33382	33305	41425	41543	41379	40924	41006	41051	77467	77491	77416
00:25:00	37	8358	8376	8395	33472	33517	33403	41639	41547	41488	41163	41159	41247	78013	77991	77939
00:26:00	36.9	8397	8399	8426	33527	33495	33419	41752	41810	41676	41321	41274	41384	78569	78535	78489
00:27:00	37	8432	8399	8444	33667	33651	33567	41957	41919	41833	41578	41603	41677	78964	79074	78956
00:28:00	37	8343	8381	8390	33935	33948	33850	42125	42138	42027	41857	41854	41942	79287	79163	79162
00:29:00	37	8391	8367	8407	34143	34161	34060	42275	42290	42178	42013	42032	42109	79587	79642	79552
00:30:00	37	8397	8420	8437	34220	34222	34129	42362	42350	42251	42117	42103	42196	79867	79902	79822
00:31:00	37	8457	8428	8471	34319	34274	34205	42490	42464	42372	42272	42251	42348	80042	79970	79943
00:32:00	37	8394	8412	8431	34420	34481	34359	42560	42638	42494	42459	42493	42562	80228	80287	80195
00:33:00	37	8375	8365	8398	34536	34482	34417	42693	42577	42530	42598	42599	42685	80508	80450	80416
00:34:00	37	8353	8371	8390	34574	34622	34506	42784	42894	42734	42816	42735	42862	80679	80749	80651
00:35:00	37	8397	8374	8414	34643	34613	34536	42904	42848	42771	42915	43081	43084	80881	80801	80778
00:36:00	37	8361	8381	8399	34743	34731	34645	42995	42981	42883	43071	42873	43058	80942	81036	80926
00:37:00	37	8363	8338	8379	34869	34904	34795	43132	43179	43051	43112	43285	43285	80992	80945	80906
00:38:00	37	8292	8313	8331	34939	34924	34840	43202	43170	43081	43309	43183	43332	81167	81111	81076
00:39:00	37	8329	8335	8360	35010	34986	34906	43204	43229	43112	43388	43452	43506	81498	81563	81468
00:40:00	37	8407	8386	8425	35043	35106	34983	43285	43252	43164	43492	43505	43585	81633	81674	81591
00:41:00	37	8390	8399	8423	35082	35015	34957	43400	43422	43306	43570	43504	43623	81666	81572	81556
00:42:00	37	8388	8399	8422	35165	35181	35081	43546	43539	43438	43714	43761	43824	81829	81861	81782
00:43:00	37	8408	8379	8422	35243	35291	35175	43670	43665	43563	43802	43817	43896	82004	82050	81964
00:44:00	37	8332	8368	8378	35301	35223	35170	43776	43784	43675	43789	43762	43862	82107	82022	82002
00:45:00	37	8377	8345	8389	35347	35416	35290	43792	43818	43700	43863	43857	43946	82098	82196	82084
00:46:00	37	8344	8381	8391	35450	35403	35335	43849	43783	43711	44038	44043	44127	82041	82003	81959
00:47:00	37	8407	8356	8410	35483	35518	35409	43941	43999	43865	44171	44192	44268	82071	82016	81981
00:48:00	37	8311	8362	8365	35588	35548	35476	44031	44017	43919	44275	44240	44344	82332	82366	82286
00:49:00	37	8394	8370	8410	35636	35686	35569	44086	44060	43968	44304	44363	44420	82499	82547	82460
00:50:00	37	8394	8384	8417	35684	35654	35577	44159	44190	44070	44425	44328	44463	82506	82449	82415
00:51:00	37	8330	8343	8365	35795	35762	35687	44157	44167	44057	44494	44593	44630	82509	82523	82453
00:52:00	37	8336	8351	8372	35876	35965	35829	44139	44108	44019	44514	44485	44586	82527	82552	82477
00:53:00	37	8399	8363	8409	35924	35837	35789	44258	44241	44145	44529	44481	44591	82514	82484	82436
00:54:00	37	8326	8348	8365	35946	35989	35876	44372	44436	44299	44677	44719	44784	82561	82553	82494
00:55:00	37	8345	8359	8380	36009	36016	35921	44410	44364	44282	44761	44779	44856	82573	82641	82544
00:56:00	37	8432	8399	8444	36054	36012	35941	44426	44438	44327	44785	44735	44846	82641	82531	82523
00:57:00	37	8395	8427	8439	36110	36153	36040	44568	44533	44446	44839	44873	44942	82695	82797	82683
00:58:00	37	8426	8389	8436	36149	36130	36048	44560	44660	44505	44893	44895	44980	82790	82726	82695
00:59:00	37	8345	8387	8394	36119	36133	36034	44536	44425	44376	44930	44898	45000	82731	82795	82700
01:00:00	37	8399	8368	8412	36172	36134	36061	44528	44595	44457	44953	45007	45066	82822	82732	82714
01:01:00	37	8347	8349	8376	36197	36263	36138	44703	44646	44570	45056	44979	45104	82956	83013	82922
01:02:00	37	8307	8331	8347	36307	36208	36166	44758	44832	44690	45126	45203	45251	83041	83062	82989
01:03:00	37	8374	8355	8393	36300	36423	36270	44814	44747	44676	45214	45165	45276	83044	82973	82946
01:04:00	37	8364	8361	8391	36298	36209	36162	44810	44850	44725	45227	45252	45326	82978	83082	82967
01:05:00	37	8318	8328	8351	36285	36300	36201	44820	44816	44713	45297	45279	45374	83014	82896	82892
01:06:00	37	8315	8308	8340	36344	36386	36273	44805	44791	44693	45349	45357	45439	83075	83135	83042
01:07:00	37	8322	8345	8362	36397	36328	36271	44866	44872	44764	45370	45387	45465	83115	83147	83068
01:08:00	37	8393	8350	8400	36396	36476	36344	45015	44988	44897	45397	45369	45469	83027	82980	82941
01:09:00	37	8316	8363	8368	36447	36375	36319	45077	45138	45003	45504	45499	45588	83060	83050	82992
01:10:00	37	8381	8344	8391	36447	36500	36382	45055	45007	44926	45608	45644	45712	83190	83220	83142
01:11:00	36.9	8328	8341	8363	36520	36485	36411	44953	44993	44868	45633	45615	45710	83235	83241	83175
01:12:00	37	8326	8342	8362	36569	36578	36482	44998	44938	44863	45654	45647	45737	83270	83216	83180
01:13:00	37	8391	8369	8408	36570	36616	36501	45107	45150	45024	45785	45769	45863	83225	83322	83211
01:14:00	37	8357	8351	8382	36639	36539	36497	45259	45241	45145	45885	45933	45995	83214	83107	83098
01:15:00	37	8314	8356	8363	36711	36818	36673	45315	45330	45218	45963	45907	46021	83173	83254	83151
01:16:00	37	8423	8373	8426	36854	36759	36715	45327	45325	45221	45975	46023	46085	83245	83192	83156
01:17:00	37	8359	8396	8406	36820	36920	36778	45302	45306	45199	45973	45961	46053	83256	83290	83210
01:18:00	37	8378	8342	8388	36828	36748	36696	45349	45324	45232	45990	45959	46061	83345	83304	83262
01:19:00	37	8299	8341	8348	36823	36852	36746	45471	45477	45369	46087	46112	46186	83309	83392	83288
01:20:00	37	8365	8327	8374	36927	36911	36827	45516	45568	45437	46139	46157	46234	83336	83229	83220
01:21:00	37	8325	8358	8370	36902	36943	36831	45558	45469	45409	46180	46125	46239	83385	83456	83358
01:22:00	37	8373	8340	8385	36801	36779	36698	45574	45656	45510	46180	46255	46304	83492	83463	83415
01:23:00	37	8321	8351	8364	36750	36729	36648	45608	45566	45482	46221	46143	46268	83428	83464	83383
01:24:00	37	8362	8343	8381	36828	36844	36744	45579	45595	45482	46195	46265	46316	83354	83338	83283
01:25:00	37	8341	8342	8370	36934	36928	36839	45674	45648	45556	46238	46185	46298	83452	83382	83354
01:26:00	37	8325	8338	8360	36931	36969	36858	45818	45815	45712	46252	46279	46352	83584	83702	83580
01:27:00	37	8368	8357	8391	36948	36881	36823	45786	45880	45728	46297	46299	46384	83656	83583	83557
01:28:00	37	8369	8365	8395	36947	37019	36891	45718	45590	45549	46339	46315	46413	83718	83690	83641
01:29:00	37	8352	8371	8390	37024	36952	36896	45708	45784	45641	46388	46418	46489	83734	83838	83723
01:30:00	37	8386	8356	8399	37021	37093	36965	45832	45805	45714	46446	46421	46520	83563	83512	83475
01:31:00	37	8324	8358	8369	37080	37015	36956	45860	45880	45765	46465	46488	46563	83462	83407	83372
01:32:00	37	8368	8336	8380	37076	37128	37010	45973	45922	45843	46512	46495	46590	83575	83625	83537
01:33:00	37	8321	8350	8364	37114	37085	37008	45992	46083	45933	46566	46581	46660	83589	83632	83548
01:34:00	36.9	8355	8326	8369	37157	37150	37062	46013	45924	45864	46730	46683	46793	83595	83479	83474
01:35:00	37	8306	8332	8347	37212	37246	37137	46014	46063	45934	46834	46909	46958	83581	83722	83589
01:36:00	37	8345	8334	8368	37255	37217	37144	46102	46077	45985	46864	46821	46929	83696	83563	83567
01:37:00	37	8340	8329	8363	37264	37302	37191	46078	46115	45992	46875	46858	46953	83756	83845	83738
01:38:00	37	8288	8302	8323	37352	37296	37232	46079	46038	45954	46932	46962	47033	83928	83861	83832
01:39:00	37	8313	8321	8345	37364	37435	37308	46145	46143	46039	46837	46872	46941	83833	83939	83823
01:40:00	37	8370	8338	8382	37356	37304	37238	46195	46246	46116	46769	46679	46810	83733	83623	83615
01:41:00	37	8322	8360	8369	37282	37316	37207	46199	46140	46065	46819	46882	46937	83638	83696	83604
01:42:00	36.9	8400	8379	8418	37303	37273	37196	46154	46212	46078	46945	46928	47023	83665	83657	83598
01:43:00	37	8393	8384	8417	37374	37371	37281	46224	46159	46087	47017	47004	47097	83708	83680	83631
01:44:00	37	8335	8364	8378	37403	37457	37338	46327	46354	46236	47056	47099	47164	83822	83847	83772
01:45:00	37	8364	8325	8373	37416	37342	37287	46355	46406	46276	47099	47046	47159	83925	83914	83857
01:46:00	37	8282	8329	8334	37412	37468	37348	46322	46237	46175	47170	47183	47263	83903	83929	83853
01:47:00	37	8351	8308	8358	37434	37414	37332	46303	46364	46229	47179	47231	47291	83840	83813	83764
01:48:00	37	8288	8304	8324	37395	37408	37310	46356	46316	46231	47095	47060	47164	83771	83789	83717
01:49:00	37	8314	8313	8342	37447	37444	37354	46320	46330	46220	47142	47151	47233	83769	83764	83704

## Sheet: Figure 2e
Time(h:mm:ss)	T° 485/20,528/20	A=n, B=n	A=n, B=n	A=n, B=n	A=0, B=0	A=0, B=0	A=0, B=0	A=0, B=1	A=0, B=1	A=0, B=1	A=1, B=0	A=1, B=0	A=1, B=0	A=1, B=1	A=1, B=1	A=1, B=1
00:00:00	36.9	8403	8324	8521	9253	9199	9419	11262	11230	11474	10265	10269	10547	19241	19344	19721
00:01:00	36.9	8444	8387	8605	9957	9848	10013	12334	12182	12305	11732	11507	11555	26662	26148	25901
00:02:00	37	8572	8484	8670	11131	11055	11255	14358	14274	14464	14525	14452	14653	32548	32758	33240
00:03:00	37	8577	8516	8730	12935	12911	13163	17634	17580	17802	19407	19401	19669	41469	41480	41766
00:04:00	37	8610	8525	8715	15590	15505	15694	22727	22725	22998	27150	27183	27490	51428	51186	51219
00:05:00	37	8539	8477	8689	18166	18050	18208	29750	29673	29871	36975	36819	36938	58463	58311	58435
00:06:00	37	8512	8426	8616	20024	19966	20183	37156	37026	37171	45638	45492	45621	62561	62573	62859
00:07:00	37	8432	8377	8596	21535	21468	21675	43490	43427	43638	51837	51753	51944	65545	65423	65576
00:08:00	37	8496	8414	8607	22718	22628	22813	48627	48506	48661	55976	55892	56084	67265	67234	67478
00:09:00	36.9	8490	8407	8600	23460	23393	23600	52219	52180	52417	58715	58696	58951	68716	68658	68876
00:10:00	36.9	8409	8354	8574	24042	23979	24192	55027	54926	55101	60964	60859	61028	69915	69797	69953
00:11:00	36.9	8470	8388	8581	24613	24536	24734	57010	56970	57206	62385	62311	62511	70519	70492	70741
00:12:00	36.9	8465	8384	8578	25079	25005	25207	58774	58684	58869	63394	63358	63598	71246	71147	71323
00:13:00	36.9	8399	8343	8562	25443	25368	25568	60147	60071	60271	64439	64332	64499	71733	71670	71883
00:14:00	36.9	8469	8388	8581	25720	25648	25851	61357	61322	61562	65098	65033	65242	72225	72162	72374
00:15:00	37	8476	8399	8597	25972	25900	26103	62694	62582	62745	65750	65716	65957	72723	72629	72810
00:16:00	36.9	8416	8343	8545	26243	26179	26390	63558	63494	63705	66594	66458	66597	72998	72942	73161
00:17:00	36.9	8381	8323	8540	26556	26469	26657	64259	64174	64364	66920	66909	67173	73314	73227	73415
00:18:00	37	8465	8372	8554	26721	26650	26853	64894	64876	65132	67488	67345	67477	73535	73482	73705
00:19:00	37	8415	8356	8573	26875	26813	27025	65835	65687	65815	67611	67626	67917	73853	73760	73941
00:20:00	37	8443	8359	8550	27119	27042	27241	66181	66162	66418	68240	68071	68177	73982	73910	74113
00:21:00	37	8423	8363	8579	27304	27215	27401	66773	66667	66836	68263	68275	68562	74110	74056	74277
00:22:00	36.9	8480	8393	8580	27368	27324	27555	67188	67148	67384	68806	68677	68823	74403	74323	74518
00:23:00	37	8426	8362	8573	27619	27519	27694	67772	67663	67830	69006	68955	69180	74583	74494	74679
00:24:00	37	8406	8325	8520	27694	27641	27864	68094	68047	68275	69312	69238	69438	74540	74467	74668
00:25:00	37	8358	8294	8505	27865	27778	27967	68554	68481	68684	69649	69585	69795	74547	74521	74771
00:26:00	36.9	8397	8325	8528	27926	27853	28055	68951	68840	69004	69975	69872	70044	74886	74745	74880
00:27:00	37	8432	8343	8528	27990	27931	28147	69077	69065	69329	70048	70007	70241	74735	74699	74938
00:28:00	37	8343	8289	8510	28173	28084	28269	69607	69480	69627	70325	70238	70425	74849	74793	75013
00:29:00	37	8391	8306	8496	28263	28207	28426	69784	69737	69966	70520	70447	70649	75125	75009	75169
00:30:00	37	8397	8336	8549	28430	28339	28524	70118	70054	70264	70685	70608	70805	75055	75004	75228
00:31:00	37	8457	8369	8557	28447	28377	28583	70506	70412	70592	70870	70826	71057	75126	75066	75280
00:32:00	37	8394	8330	8541	28499	28444	28665	70645	70568	70765	71227	71110	71267	75317	75218	75393
00:33:00	37	8375	8297	8494	28693	28597	28776	70729	70686	70917	71228	71186	71419	75310	75256	75478
00:34:00	37	8353	8289	8500	28706	28645	28859	71054	70959	71140	71379	71288	71472	75402	75318	75509
00:35:00	37	8397	8313	8503	28746	28659	28848	71225	71150	71349	71457	71401	71620	75438	75372	75581
00:36:00	37	8361	8298	8510	28746	28702	28934	71351	71297	71517	71664	71583	71776	75516	75437	75632
00:37:00	37	8363	8277	8467	28958	28852	29022	71598	71496	71668	71804	71733	71936	75567	75506	75719
00:38:00	37	8292	8230	8442	28949	28899	29123	71696	71662	71904	71879	71789	71975	75669	75581	75767
00:39:00	37	8329	8259	8464	29046	28962	29154	72062	71958	72129	71856	71807	72034	75628	75549	75746
00:40:00	37	8407	8323	8515	29046	28960	29150	72195	72134	72348	72091	72030	72243	75609	75575	75817
00:41:00	37	8390	8321	8528	28993	28953	29189	72319	72239	72434	72372	72248	72398	75909	75805	75976
00:42:00	37	8388	8320	8528	29225	29123	29296	72381	72311	72517	72214	72182	72424	75909	75822	76010
00:43:00	37	8408	8321	8508	29302	29255	29484	72496	72427	72633	72334	72256	72452	75711	75662	75887
00:44:00	37	8332	8277	8497	29459	29345	29506	72702	72637	72847	72504	72430	72632	75739	75667	75870
00:45:00	37	8377	8288	8474	29316	29278	29514	72947	72849	73026	72624	72533	72716	75866	75791	75992
00:46:00	37	8344	8289	8510	29445	29372	29573	72996	72950	73180	72607	72562	72792	75945	75864	76058
00:47:00	37	8407	8309	8485	29612	29529	29722	73196	73113	73304	72793	72696	72874	75866	75786	75981
00:48:00	37	8311	8264	8491	29594	29490	29662	73256	73162	73343	72863	72816	73043	75704	75647	75865
00:49:00	37	8394	8309	8499	29394	29395	29670	73127	73089	73326	73054	72948	73117	75702	75611	75796
00:50:00	37	8394	8316	8513	29729	29584	29714	73247	73134	73296	73008	72979	73225	75735	75714	75968
00:51:00	37	8330	8263	8472	29602	29574	29820	73237	73234	73505	73135	72993	73127	76091	75932	76048
00:52:00	37	8336	8271	8480	29694	29588	29758	73650	73485	73595	72822	72823	73098	75847	75847	76122
00:53:00	37	8399	8308	8492	29642	29613	29858	73413	73414	73690	73060	72944	73103	76085	75993	76176
00:54:00	37	8326	8264	8477	29845	29717	29864	73603	73484	73641	73122	73073	73300	76181	76064	76222
00:55:00	37	8345	8279	8488	29685	29656	29902	73573	73528	73757	73285	73187	73365	75949	75948	76223
00:56:00	37	8432	8343	8528	29826	29739	29926	73739	73666	73869	73256	73196	73411	76231	76105	76253
00:57:00	37	8395	8338	8556	29902	29821	30015	73873	73766	73934	73318	73253	73464	76180	76119	76333
00:58:00	37	8426	8335	8518	29882	29821	30035	73737	73708	73954	73450	73362	73549	76196	76158	76394
00:59:00	37	8345	8293	8516	29917	29825	30008	73881	73773	73941	73434	73354	73549	76403	76261	76393
01:00:00	37	8399	8311	8497	29882	29844	30082	73823	73768	73989	73407	73377	73622	76116	76111	76381
01:01:00	37	8347	8275	8478	30098	29992	30160	73890	73809	74003	73667	73534	73676	76272	76153	76310
01:02:00	37	8307	8246	8460	30062	29997	30207	73983	73930	74151	73511	73480	73724	76227	76197	76442
01:03:00	37	8374	8291	8484	30048	29989	30206	74194	74088	74257	73636	73555	73749	76403	76278	76427
01:04:00	37	8364	8289	8490	30142	30046	30226	74158	74115	74347	73756	73672	73863	76216	76187	76433
01:05:00	37	8318	8250	8457	30092	30038	30259	74285	74198	74386	73776	73714	73927	76306	76202	76372
01:06:00	37	8315	8238	8437	30173	30098	30299	74287	74205	74399	73852	73780	73983	76290	76254	76493
01:07:00	37	8322	8260	8474	30222	30130	30313	74198	74138	74353	73881	73780	73954	76520	76417	76588
01:08:00	37	8393	8299	8479	30113	30060	30282	74253	74196	74414	73733	73705	73952	76485	76409	76608
01:09:00	37	8316	8267	8492	30160	30078	30272	74388	74261	74408	73928	73814	73976	76385	76336	76562
01:10:00	37	8381	8290	8473	30207	30145	30357	74162	74153	74419	73931	73900	74144	76494	76414	76609
01:11:00	36.9	8328	8262	8470	30302	30208	30390	74406	74297	74464	74154	74030	74180	76525	76422	76594
01:12:00	37	8326	8261	8471	30243	30190	30413	74460	74393	74601	74028	74007	74261	76357	76327	76572
01:13:00	37	8391	8307	8498	30308	30224	30415	74498	74424	74625	74185	74069	74227	76571	76486	76676
01:14:00	37	8357	8281	8480	30301	30225	30424	74551	74488	74700	74044	73989	74208	76743	76665	76862
01:15:00	37	8314	8262	8485	30277	30216	30429	74670	74586	74777	74039	73979	74195	76734	76630	76801
01:16:00	37	8423	8325	8502	30366	30290	30489	74671	74592	74788	74191	74104	74291	76519	76511	76777
01:17:00	37	8359	8305	8525	30426	30341	30531	74625	74580	74810	74211	74130	74324	76791	76664	76811
01:18:00	37	8378	8287	8471	30387	30335	30557	74743	74626	74784	74145	74088	74307	76738	76697	76931
01:19:00	37	8299	8247	8470	30463	30369	30549	74584	74555	74802	74225	74144	74339	76818	76716	76889
01:20:00	37	8365	8273	8456	30386	30322	30533	74734	74633	74806	74299	74236	74449	76747	76711	76950
01:21:00	37	8325	8268	8487	30389	30324	30534	74745	74682	74893	74392	74289	74461	76914	76809	76979
01:22:00	37	8373	8284	8469	30500	30421	30617	74833	74771	74983	74285	74250	74490	76850	76793	77011
01:23:00	37	8321	8263	8480	30560	30479	30672	74990	74899	75082	74462	74367	74547	76829	76745	76935
01:24:00	37	8362	8279	8472	30547	30492	30712	74958	74883	75084	74522	74449	74652	76746	76685	76899
01:25:00	37	8341	8269	8471	30632	30539	30721	74905	74851	75073	74572	74528	74759	76763	76687	76886
01:26:00	37	8325	8259	8467	30565	30496	30702	75036	74948	75135	74709	74567	74700	76766	76669	76847
01:27:00	37	8368	8290	8486	30562	30518	30749	75102	75041	75255	74354	74361	74642	76706	76696	76961
01:28:00	37	8369	8294	8494	30750	30625	30776	75208	75126	75318	74533	74397	74536	77095	76950	77080
01:29:00	37	8352	8288	8500	30575	30549	30798	75176	75090	75280	74416	74405	74670	76974	76949	77199
01:30:00	37	8386	8298	8485	30688	30589	30765	75045	75001	75232	74644	74491	74613	77068	76961	77129
01:31:00	37	8324	8268	8487	30643	30573	30778	75148	75057	75240	74403	74419	74710	76982	76946	77185
01:32:00	37	8368	8279	8465	30606	30546	30762	75145	75072	75275	74749	74609	74743	77112	77003	77169
01:33:00	37	8321	8262	8479	30675	30582	30763	75126	75055	75258	74660	74615	74844	76996	76938	77154
01:34:00	36.9	8355	8268	8455	30634	30583	30806	75174	75114	75329	74687	74611	74810	77012	76956	77175
01:35:00	37	8306	8246	8461	30743	30657	30846	75332	75239	75420	74734	74668	74877	77195	77103	77287
01:36:00	37	8345	8266	8463	30756	30681	30881	75335	75276	75492	74775	74674	74848	77186	77101	77291
01:37:00	37	8340	8262	8458	30726	30661	30871	75394	75315	75510	74615	74578	74815	77060	77015	77245
01:38:00	37	8288	8222	8431	30752	30674	30870	75395	75324	75527	74714	74612	74784	77171	77088	77280
01:39:00	37	8313	8244	8450	30746	30674	30877	75370	75287	75480	74698	74657	74892	77222	77143	77338
01:40:00	37	8370	8281	8467	30746	30671	30872	75311	75259	75483	74878	74768	74934	77150	77060	77245
01:41:00	37	8322	8268	8489	30761	30695	30904	75434	75344	75529	74807	74755	74978	77038	77024	77285
01:42:00	36.9	8400	8317	8508	30840	30763	30961	75459	75387	75590	74891	74823	75031	77364	77231	77373
01:43:00	37	8393	8316	8513	30863	30777	30966	75500	75445	75666	75044	74963	75157	77224	77166	77382
01:44:00	37	8335	8276	8493	30807	30764	30996	75649	75548	75722	75053	74963	75148	77111	77052	77269
01:45:00	37	8364	8271	8454	30958	30856	31029	75572	75523	75750	74896	74856	75090	77179	77099	77294
01:46:00	37	8282	8232	8458	30899	30837	31050	75593	75491	75664	74952	74853	75028	77248	77169	77364
01:47:00	37	8351	8256	8437	30893	30827	31036	75470	75441	75688	74841	74757	74949	77306	77259	77487
01:48:00	37	8288	8223	8433	30950	30858	31041	75635	75515	75671	74798	74804	75085	77492	77370	77522
01:49:00	37	8314	8241	8442	30918	30853	31064	75485	75428	75646	75308	75197	75361	77344	77291	77514

## Sheet: Figure 3b
Time(h:mm:ss)	T° 485/20,528/20	Negative	Negative	Negative	Positive	Positive	Positive	0 nt	0 nt	0 nt	1 nt	1 nt	1 nt	2nt	2nt	2nt	3 nt	3 nt	3 nt
00:00:00	37	25152	25393	25585	42396	39915	41486	24867	25231	25362	27171	27481	27638	33010	33349	33492	27322	27866	27379
00:01:00	37	25127	25444	25598	74080	79994	77406	34033	34146	34402	32484	32691	32900	37189	37349	37581	32567	32492	32314
00:02:00	37	25182	25433	25620	119401	119193	119609	44481	44607	44856	38379	38549	38776	42070	42207	42451	37682	37894	37572
00:03:00	37	25130	25370	25562	162263	161567	162227	56011	56381	56508	44606	44879	45055	47383	47651	47829	43194	43540	43152
00:04:00	37	24946	25238	25405	192094	191827	192272	70045	70610	70640	52018	52353	52498	54352	54645	54811	50953	51526	51024
00:05:00	37	24900	25175	25350	209531	210153	210154	86783	86769	87088	61372	61715	61856	64165	64577	64683	62560	62851	62490
00:06:00	37	24942	25187	25377	221421	221997	222021	102927	103375	103463	72608	72826	73029	77680	78051	78178	76724	77117	76705
00:07:00	37	24907	25165	25348	230448	230399	230736	118431	118359	118707	84751	85055	85215	94042	94239	94452	92550	92895	92507
00:08:00	37	24867	25168	25330	235668	236096	236194	131112	131574	131655	97372	97695	97846	111162	111337	111562	108351	108410	108164
00:09:00	37	24979	25207	25405	239797	240232	240327	142715	142940	143139	109592	109441	109828	127749	128130	128252	122203	122650	122211
00:10:00	37	24982	25277	25442	243644	243585	243926	152682	152932	153119	119851	120611	120544	143558	143538	143860	135290	135627	135242
00:11:00	37	25042	25265	25466	246029	246820	246737	160923	161208	161378	131445	131596	131832	156992	157490	157553	147372	147707	147323
00:12:00	37	24974	25292	25446	249556	249216	249698	167524	167569	167858	141890	141931	142223	169781	170039	170222	158073	158246	157943
00:13:00	37	25080	25299	25502	250695	251411	251365	172336	172839	172900	150033	150348	150502	180942	181042	181304	166906	167400	166937
00:14:00	37	25040	25334	25500	252977	253059	253330	177782	178212	178309	157329	157788	157871	189575	189789	189994	175158	175484	175105
00:15:00	37	25074	25326	25512	254669	255045	255169	183512	183449	183793	164652	164721	164999	196701	197127	197226	182143	182262	181987
00:16:00	37	25060	25304	25494	256172	256309	256552	187250	187751	187813	170613	170900	171069	203933	204465	204511	187159	187666	187197
00:17:00	37	25024	25373	25511	256593	256739	256978	190544	190492	190830	176106	176499	176614	211002	210573	211100	191906	192098	191786
00:18:00	37	25242	25377	25622	256538	257082	257122	192183	192752	192780	181765	182112	182250	214526	215453	215302	195955	196613	196068
00:19:00	37	25014	25403	25521	257996	258323	258472	194654	194858	195068	186735	186453	186906	219214	218956	219397	200431	200334	200167
00:20:00	37	25157	25329	25555	259696	259533	259927	196894	197065	197292	189208	190182	190008	222050	222905	222790	202578	202859	202502
00:21:00	37	25047	25380	25526	259642	260337	260301	198554	198969	199073	193758	193682	194032	226119	225790	226266	204560	205606	204868
00:22:00	37	25149	25372	25573	260830	260865	261159	200379	200417	200710	196686	196700	197005	227621	228285	228265	209060	208583	208605
00:23:00	37	25133	25413	25585	261245	261501	261685	201367	201926	201959	198268	199102	198997	229690	229561	229937	210345	211056	210485
00:24:00	37	25159	25441	25612	261561	262072	262128	203161	203126	203456	201707	201498	201914	230807	231755	231594	212044	212226	211919
00:25:00	37	25215	25425	25632	262562	262395	262790	203970	204555	204575	203573	204043	204120	234051	233524	234099	213279	213679	213263
00:26:00	37	25096	25439	25580	262165	262851	262820	205498	205412	205767	205969	206380	206486	234530	235322	235238	214845	215206	214810
00:27:00	37	25243	25440	25654	263330	263467	263711	205718	206177	206260	208605	208501	208865	236596	236848	237034	216667	217061	216648
00:28:00	37	25183	25494	25651	264103	264134	264430	206699	207094	207209	209493	210082	210100	238451	238318	238696	218247	218154	217985
00:29:00	37	25238	25465	25664	264018	264745	264694	208247	208180	208525	210945	210946	211258	238454	239012	239045	218278	219154	218500
00:30:00	37	25193	25492	25655	265343	265246	265607	208650	209264	209269	211495	211907	212013	239611	240062	240149	220328	220449	220172
00:31:00	37	25276	25531	25716	264951	265066	265321	210074	210122	210410	212752	213152	213264	241511	241320	241727	221539	221610	221359
00:32:00	37	25322	25580	25764	263935	264715	264637	210619	210893	211068	214614	214609	214923	241575	242187	242193	221434	222113	221558
00:33:00	37	25277	25515	25708	265134	265000	265379	210916	211239	211389	215399	215904	215964	242549	242692	242933	222498	222532	222299
00:34:00	37	25163	25492	25640	265379	265900	265952	211496	211777	211948	216580	216541	216872	243135	243383	243571	223088	223746	223201
00:35:00	37	25320	25540	25742	266159	266144	266463	212216	212466	212653	216825	217382	217416	243453	243790	243934	224961	225154	224841
00:36:00	37	25343	25622	25795	265974	266418	266508	212748	212908	213140	218353	218630	218803	243816	243817	244128	225988	226102	225829
00:37:00	37	25351	25583	25779	266591	267062	267138	212940	213427	213496	219976	220007	220304	243695	244501	244410	225583	225983	225567
00:38:00	37	25302	25653	25790	267691	267321	267818	213870	213946	214220	220368	220812	220902	245643	245426	245846	225627	226172	225684
00:39:00	37	25543	25696	25932	266557	267567	267374	214025	214319	214484	220932	221014	221285	245901	246446	246486	227125	227506	227100
00:40:00	37	25420	25801	25923	267875	267606	268053	214096	214343	214532	220981	221494	221550	246339	246216	246590	228511	228205	228142
00:41:00	37	25585	25723	25966	267642	268251	268258	214440	214920	214992	221963	222028	222307	245562	246314	246250	227561	228712	227921
00:42:00	37	25342	25720	25844	268085	267938	268323	215621	215589	215917	222434	222908	222983	246698	246713	247017	229409	229261	229119
00:43:00	37	25476	25666	25883	267422	268147	268097	215697	216132	216227	223288	223119	223515	247190	247487	247651	229551	229724	229422
00:44:00	37	25453	25789	25934	268679	268828	269065	216194	216451	216635	222985	224003	223806	247398	247497	247760	229004	229864	229218
00:45:00	37	25610	25789	26011	269521	269566	269855	216655	216824	217052	225052	224460	225068	247305	247935	247932	230554	230583	230353
00:46:00	37	25455	25789	25935	268969	269298	269446	216716	217084	217212	224234	224973	224916	248828	248881	249166	230744	230669	230490
00:47:00	37	25505	25728	25929	268611	269069	269152	217129	217365	217559	225279	225864	225884	249628	249830	250041	229567	230729	229933
00:48:00	37	25467	25755	25923	269284	269429	269669	217446	217679	217875	227409	226812	227423	249845	250226	250347	231685	231469	231361
00:49:00	37	25538	25815	25989	269576	269730	269965	217552	217848	218012	226109	226999	226866	250351	250643	250809	231990	232251	231905
00:50:00	37	25648	25879	26076	269473	269883	269990	217702	217941	218134	226921	227154	227349	250667	250677	250984	231687	232370	231813
00:51:00	37	25591	25867	26042	270257	270755	270818	217785	218017	218213	228099	228137	228430	250002	250545	250586	232722	232723	232506
00:52:00	37	25563	25847	26017	271514	271198	271668	217993	218417	218517	228273	228646	228772	250543	250867	251017	232862	233417	232924
00:53:00	37	25628	25879	26066	270109	270601	270667	218901	219029	219277	228719	229100	229221	251233	250877	251367	233658	233886	233556
00:54:00	37	25631	25886	26071	269688	270367	270340	219225	219442	219645	229448	229512	229792	250323	251763	251356	233978	234194	233870
00:55:00	37	25586	25871	26041	271250	271055	271465	219276	219716	219808	229123	229419	229583	253306	252291	253111	233827	234386	233891
00:56:00	37	25629	25893	26073	270965	271208	271398	219927	220039	220295	228754	229022	229200	251967	253060	252826	234476	234627	234336
00:57:00	37	25665	25905	26098	270367	271037	271014	220008	220336	220484	228985	229579	229594	253030	253040	253347	234469	234709	234373
00:58:00	37	25610	25911	26073	271250	271130	271502	220130	220323	220538	230422	230119	230582	253556	253783	253982	234375	235053	234498
00:59:00	37	25666	25899	26095	270681	271000	271152	220165	220591	220690	229836	230508	230484	253578	253828	254015	235753	235794	235558
01:00:00	37	25616	25894	26067	270214	270613	270726	220829	220938	221195	230627	230881	231066	253567	253985	254088	236047	236291	235953
01:01:00	37	25614	25886	26063	270777	271137	271269	220961	221299	221442	231445	231455	231762	254174	254387	254593	236010	236816	236197
01:02:00	37	25662	25921	26104	271734	271631	271995	221224	221482	221665	231068	231473	231583	254260	254130	254507	237336	236856	236880
01:03:00	37	25677	25927	26114	271337	272057	272009	221432	221671	221864	231245	231670	231770	253290	254405	254160	236105	237383	236529
01:04:00	37	25649	25949	26111	272126	271798	272274	221475	221728	221914	232090	231991	232352	255338	254812	255387	237793	237269	237315
01:05:00	37	25746	25986	26178	271327	272380	272166	221546	221894	222032	231846	232579	232525	254556	255160	255170	236756	237586	236955
01:06:00	37	25733	25982	26170	273084	272659	273183	221974	222165	222382	233006	232766	233198	254326	254315	254632	237254	237446	237134
01:07:00	37	25663	25982	26135	272345	272824	272896	222124	222394	222571	232604	233351	233290	254073	255080	254889	237653	237890	237556
01:08:00	37	25771	25963	26179	272111	272573	272654	222223	222521	222684	233564	233407	233797	256444	255701	256385	237869	238480	237959
01:09:00	37	25660	25997	26141	272890	272974	273244	222443	222670	222869	233185	233822	233816	255435	256566	256313	238839	238755	238581
01:10:00	37	25780	25996	26200	272897	273137	273329	222567	222881	223036	233693	233551	233934	256803	256443	256935	238159	238619	238173
01:11:00	37	25744	26022	26196	272453	272779	272928	222818	222998	223220	232976	233477	233539	256205	256816	256823	238201	238896	238333
01:12:00	37	25734	26007	26183	272169	272360	272577	222849	223222	223347	233676	234382	234341	256594	256757	256988	239760	239555	239441
01:13:00	37	25776	26042	26221	271946	272366	272468	223307	223528	223729	235679	234856	235580	256881	257211	257358	239315	239872	239378
01:14:00	37	25804	26049	26239	272544	272763	272965	223584	223815	224011	233722	235057	234703	257164	257237	257512	239529	240023	239560
01:15:00	37	25746	26032	26202	272914	272902	273220	223589	223878	224046	235230	234904	235379	256782	257329	257368	240358	240204	240065
01:16:00	37	25766	26012	26201	272547	273324	273248	223629	223883	224068	235139	235473	235618	257315	257286	257612	239792	240872	240116
01:17:00	37	25780	26082	26244	274160	274220	274502	223728	224016	224184	235278	235937	235920	257048	257586	257629	241414	240823	240903
01:18:00	37	25931	26151	26353	274494	274193	274655	224037	224313	224487	236673	236347	236822	257698	257728	258025	240004	241103	240338
01:19:00	37	25927	26235	26393	272679	273843	273574	224443	224672	224870	235755	236265	236322	257801	258354	258390	241024	240947	240769
01:20:00	37	26005	26225	26427	274451	274411	274743	224699	225001	225162	235855	236485	236482	258636	258482	258871	240907	241269	240872
01:21:00	37	25904	26195	26362	275056	274850	275265	224975	225168	225384	237444	237093	237580	258118	258810	258776	240778	241212	240779
01:22:00	37	25885	26157	26333	273302	273958	273942	225010	225370	225502	236736	237375	237368	259045	259046	259358	241330	241680	241289
01:23:00	37	25901	26126	26326	273496	274190	274155	225378	225586	225794	237136	237418	237589	259230	259642	259748	241988	242102	241829
01:24:00	37	25825	26162	26306	275380	274750	275377	225545	225820	225994	237683	237672	237989	259564	259648	259918	241887	242588	242022
01:25:00	37	25999	26191	26407	273693	274470	274394	225641	225896	226080	237216	237855	237848	259219	259634	259739	242621	242285	242237
01:26:00	37	25921	26220	26383	273621	274054	274149	225684	225953	226131	237798	237573	237998	259482	259746	259926	241400	242582	241775
01:27:00	37	25946	26225	26398	274372	274036	274516	225811	226112	226273	237133	238063	237910	259886	260062	260286	243150	242828	242773
01:28:00	37	26034	26274	26466	273197	274040	273931	226110	226324	226529	238638	238250	238756	259980	260380	260492	242804	243251	242812
01:29:00	37	25985	26241	26425	274356	274527	274754	226252	226567	226722	237972	238741	238669	260346	260370	260670	242845	243597	243005
01:30:00	37	25893	26184	26351	275361	275207	275596	226500	226719	226921	238414	238134	238586	259986	260565	260588	244330	243906	243902
01:31:00	37	25955	26235	26408	274820	275717	275581	226533	226817	226987	237366	238217	238104	260711	260749	261042	243332	244517	243709
01:32:00	37	26064	26272	26480	276226	276183	276517	226571	226821	227008	238588	238453	238832	260663	261061	261174	244668	244136	244186
01:33:00	37	25934	26233	26396	275696	275276	275798	226607	226896	227064	239000	239658	239641	260632	260532	260894	243124	243919	243306
01:34:00	37	25945	26231	26400	272940	274594	274080	226809	227081	227257	240189	239814	240313	259861	261001	260743	243490	244011	243535
01:35:00	37	26078	26309	26506	275661	274912	275599	227063	227302	227495	239156	240095	239938	261853	260985	261732	245068	245070	244853
01:36:00	37	26071	26342	26519	275359	276037	276010	227169	227413	227603	240372	240326	240661	259908	260990	260762	244868	244981	244709
01:37:00	37	26062	26349	26518	275359	275042	275513	227225	227573	227711	240447	240508	240790	260541	260459	260812	243674	244582	243912
01:38:00	37	26114	26338	26538	274172	275663	275230	227572	227751	227974	239625	240350	240300	260730	261249	261302	244742	244582	244446
01:39:00	37	26028	26340	26496	277096	275926	276823	227582	227851	228029	240527	240426	240789	261499	261371	261747	244528	245176	244636
01:40:00	37	26084	26301	26505	275126	276379	276065	227630	227986	228120	240407	240899	240965	260910	261501	261518	245142	245156	244933
01:41:00	37	26013	26326	26482	276004	275822	276225	228041	228194	228429	240784	240846	241127	261612	261896	262066	244921	245574	245032
01:42:00	37	26103	26340	26534	275948	276435	276504	228082	228433	228570	240528	240972	241062	262448	262453	262762	245835	245973	245688
01:43:00	37	26078	26323	26513	276389	276454	276734	228330	228518	228736	240878	240978	241240	262040	262461	262563	246023	246373	245982
01:44:00	37	25991	26322	26469	276170	276711	276753	228358	228697	228840	240987	241439	241525	262049	262352	262513	245803	245963	245667
01:45:00	37	26128	26300	26526	276466	276254	276672	228642	228854	229060	241928	242101	242326	262313	262438	262688	245201	245860	245315
01:46:00	37	26000	26360	26493	275235	276031	275945	228789	229089	229251	242598	242869	243046	262226	262663	262756	246163	246321	246026
01:47:00	37	26198	26410	26616	276003	276028	276328	229024	229278	229463	242972	243259	243427	262810	263037	263236	246740	247094	246701
01:48:00	37	26207	26456	26644	276102	276201	276463	229166	229412	229601	242951	243048	243311	263084	263043	263376	246935	247092	246797
01:49:00	37	26131	26457	26607	275661	276302	276294	229166	229450	229620	242183	242688	242748	262510	263463	263299	246410	247008	246493
01:50:00	37	26262	26473	26680	276751	276937	277156	229202	229460	229643	242278	242220	242561	264119	263572	264157	246792	246843	246601
01:51:00	37	26177	26446	26624	277058	276797	277239	229227	229472	229661	242047	242941	242806	262911	263732	263634	246520	247074	246581
01:52:00	37	26084	26374	26541	275185	276059	275934	229273	229599	229748	244075	243609	244154	263364	263537	263762	247232	247559	247180
01:53:00	37	26144	26415	26592	275877	275959	276230	229610	229821	230027	243614	244429	244334	263470	263353	263723	247889	248044	247750
01:54:00	37	26227	26447	26649	276777	277192	277296	229800	230103	230263	244442	244317	244691	262298	263227	263075	247426	247666	247330
01:55:00	37	26137	26448	26605	277665	277409	277849	230040	230252	230458	243916	244432	244486	263376	262984	263492	246763	247604	246968
01:56:00	37	26199	26429	26626	276576	277557	277379	230089	230416	230565	243946	244074	244322	262482	263178	263142	247811	247345	247362
01:57:00	37	26196	26509	26665	277620	277149	277697	230329	230556	230754	243513	243647	243892	263058	263199	263440	246456	247583	246804
01:58:00	37	26322	26511	26729	276548	277424	277298	230413	230650	230843	243198	244041	243932	263516	263737	263939	247809	247512	247444
01:59:00	37	26206	26551	26691	277696	277864	278092	230438	230826	230944	245107	244480	245106	263715	264056	264197	247629	248124	247661
02:00:00	37	26365	26603	26796	278277	278489	278695	230829	231037	231245	244601	245216	245221	264027	264262	264456	248935	249278	248891

## Sheet: Figure 3c
Time(h:mm:ss)	T° 485/20,528/20	Negative	Negative	Negative	Positive	Positive	Positive	0 nt	0 nt	0 nt	1 nt	1 nt	1 nt	2nt	2nt	2nt	3 nt	3 nt	3 nt	4 nt	4 nt	4 nt
00:00:00	37	25152	26059	24512	42396	40581	40401	24867	25897	24289	35826	36810	35223	31749	32847	31205	32726	33987	32264	38805	39712	38163
00:01:00	37	25127	26110	24525	74080	80660	76342	34033	34812	33327	40163	41009	39490	36130	36762	35349	38468	38672	37472	44372	45366	43774
00:02:00	37	25182	26099	24547	119401	119859	118532	44481	45273	43781	45205	46071	44542	41549	42377	40867	46211	47345	45683	51300	52188	50648
00:03:00	37	25130	26036	24489	162263	162233	161150	56011	57047	55433	50891	51822	50261	48323	49442	47788	58618	59880	58154	59252	60206	58633
00:04:00	37	24946	25904	24332	192094	192493	191195	70045	71276	69565	57923	58977	57354	57976	58905	57345	75984	76824	75307	68393	69412	67806
00:05:00	37	24900	25841	24277	209531	210819	209078	86783	87435	86012	67005	67900	66356	69833	70827	69234	94748	95467	94010	78620	79494	77960
00:06:00	37	24942	25853	24303	221421	222663	220945	102927	104041	102388	77408	78418	76816	83237	84122	82583	112410	113324	111770	88807	89758	88186
00:07:00	37	24907	25831	24275	230448	231065	229659	118431	119025	117631	88823	89629	88129	96792	97670	96134	128948	130093	128424	98498	99306	97805
00:08:00	37	24867	25834	24257	235668	236762	235118	131112	132240	130579	100024	101052	99441	109640	110544	108995	144537	145003	143672	107005	108054	106433
00:09:00	37	24979	25873	24332	239797	240898	239250	142715	143606	142063	111247	112100	110576	121538	122527	120935	156853	158350	156505	115073	116068	114474
00:10:00	37	24982	25943	24369	243644	244251	242850	152682	153598	152043	121594	122410	120905	132554	133320	131839	168998	169252	168027	122065	122659	121264
00:11:00	37	25042	25931	24393	246029	247486	245660	160923	161874	160301	131075	132274	130578	142084	143276	141583	177469	179129	177203	126596	127700	126051
00:12:00	37	24974	25958	24373	249556	249882	248621	167524	168235	166782	141039	141844	140344	151454	152111	150685	186658	186902	185682	131216	132217	130619
00:13:00	37	25080	25965	24428	250695	252077	250289	172336	173505	171823	149703	150479	148994	158947	160020	158386	192454	193847	192054	136454	137506	135883
00:14:00	37	25040	26000	24427	252977	253725	252253	177782	178878	177233	156755	157859	156210	166046	167024	165438	198759	199599	198081	142026	142687	141259
00:15:00	37	25074	25992	24439	254669	255711	254092	183512	184115	182716	163691	164520	163008	172577	173349	171865	204087	204857	203375	146235	147360	145701
00:16:00	37	25060	25970	24421	256172	256975	255476	187250	188417	186737	169990	171208	169502	177815	178958	177289	208017	209300	207562	150530	151335	149835
00:17:00	37	25024	26039	24438	256593	257405	255902	190544	191158	189753	176324	176656	175392	182894	183517	182108	212002	212253	211030	154096	155076	153489
00:18:00	37	25242	26043	24548	256538	257748	256046	192183	193418	191704	180021	181594	179711	186480	187764	186025	213387	215161	213178	157590	158578	156987
00:19:00	37	25014	26069	24449	257996	258989	257395	194654	195524	193991	185396	185917	184559	190827	191537	190085	217449	217887	216570	161100	161886	160396
00:20:00	37	25157	25995	24481	259696	260199	258850	196894	197731	196215	189278	190366	188725	194069	195007	193440	219625	220494	218962	164050	165300	163578
00:21:00	37	25047	26046	24453	259642	261003	259225	198554	199635	197997	193278	194213	192648	196913	198023	196371	221107	222371	220642	167555	167928	166643
00:22:00	37	25149	26038	24499	260830	261531	260082	200379	201083	199633	197180	198169	196577	199988	200742	199267	223816	224628	223125	169009	170480	168648
00:23:00	37	25133	26079	24512	261245	262167	260608	201367	202592	200883	200726	201563	200047	201830	202628	201131	225791	226472	225034	172321	173124	171625
00:24:00	37	25159	26107	24539	261561	262738	261052	203161	203792	202379	202987	203584	202188	203044	204367	202608	226456	227760	226011	175101	175764	174335
00:25:00	37	25215	26091	24559	262562	263061	261713	203970	205221	203498	204125	205850	203891	205789	206471	205032	228156	228798	227379	176447	177621	175937
00:26:00	37	25096	26105	24508	262165	263517	261744	205498	206078	204690	208201	208550	207277	207654	208811	207135	228881	229955	228320	178580	179540	177962
00:27:00	37	25243	26106	24580	263330	264133	262634	205718	206843	205183	210016	211001	209411	209133	209268	208103	229987	230815	229303	180889	181642	180168
00:28:00	37	25183	26160	24578	264103	264800	263354	206699	207760	206132	211163	212124	210546	208084	210296	208095	231166	232440	230706	182430	183487	181861
00:29:00	37	25238	26131	24590	264018	265411	263618	208247	208846	207449	212603	213906	212157	211647	211644	210548	233310	233600	232357	184333	185335	183737
00:30:00	37	25193	26158	24582	265343	265912	264530	208650	209930	208193	214945	215032	213891	212015	213034	211427	233313	235076	233098	186256	186902	185481
00:31:00	37	25276	26197	24643	264951	265732	264244	210074	210788	209333	214458	216363	214314	212277	213647	211865	235552	235561	234458	187027	188190	186512
00:32:00	37	25322	26246	24690	263935	265381	263561	210619	211559	209991	217253	217490	216273	214490	215131	213713	234697	236443	234474	188795	189837	188219
00:33:00	37	25277	26181	24635	265134	265666	264302	210916	211905	210313	218081	219499	217693	215588	216379	214886	236180	236439	235211	190998	191597	190200
00:34:00	37	25163	26158	24567	265379	266566	264875	211496	212443	210872	219791	220237	218916	215890	217278	215487	235919	237500	235613	191783	192898	191243
00:35:00	37	25320	26206	24669	266159	266810	265387	212216	213132	211576	219551	220682	219019	217345	217615	216382	237675	238008	236744	193172	194177	192577
00:36:00	37	25343	26288	24722	265974	267084	265431	212748	213574	212063	220188	221378	219686	216571	218009	216193	237623	238933	237181	195044	195904	194376
00:37:00	37	25351	26249	24706	266591	267728	266062	212940	214093	212419	222198	222846	221424	217900	219011	217358	238912	239819	238268	196415	197178	195699
00:38:00	37	25302	26319	24717	267691	267987	266741	213870	214612	213143	223050	224003	222429	219752	219865	218711	240269	241132	239603	197130	198353	196644
00:39:00	37	25543	26362	24858	266557	268233	266298	214025	214985	213407	223514	224563	222941	218450	220168	218212	240701	241280	239893	198995	199851	198325
00:40:00	37	25420	26467	24851	267875	268272	266976	214096	215009	213455	224101	224750	223328	219858	220512	219087	240008	241766	239791	200412	201138	199677
00:41:00	37	25585	26389	24892	267642	268917	267182	214440	215586	213916	223940	225299	223523	220664	221434	219951	242091	242048	240971	200663	201723	200096
00:42:00	37	25342	26386	24771	268085	268604	267247	215621	216255	214840	225451	226144	224700	220790	222035	220315	241205	243003	241008	201420	202451	200838
00:43:00	37	25476	26332	24810	267422	268813	267020	215697	216798	215150	226061	226897	225381	222039	222866	221355	242969	243314	242044	202850	203665	202160
00:44:00	37	25453	26455	24861	268679	269494	267989	216194	217117	215558	225968	227026	225400	222555	223126	221743	242887	244048	242370	203949	204966	203360
00:45:00	37	25610	26455	24938	269521	270232	268779	216655	217490	215975	226483	227538	225913	221698	223111	221307	243301	244220	242663	205067	205899	204386
00:46:00	37	25455	26455	24862	268969	269964	268369	216716	217750	216136	227438	228098	226670	223027	223973	222402	243866	244826	243249	205546	206448	204900
00:47:00	37	25505	26394	24855	268611	269735	268075	217129	218031	216483	227224	228240	226635	224481	224934	223610	244376	245135	243658	205880	206858	205272
00:48:00	37	25467	26421	24850	269284	270095	268592	217446	218345	216798	227392	228504	226851	223828	225170	223402	244281	245384	243735	206896	208122	206412
00:49:00	37	25538	26481	24916	269576	270396	268888	217552	218514	216936	228499	229245	227774	224412	225176	223696	245036	246050	244446	208871	209230	207953
00:50:00	37	25648	26545	25002	269473	270549	268914	217702	218607	217057	228987	229981	228387	224778	225765	224174	246089	246832	245363	208645	210054	208253
00:51:00	37	25591	26533	24968	270257	271421	269742	217785	218683	217137	229453	230306	228782	225421	226387	224806	245920	246654	245189	209730	210369	208952
00:52:00	37	25563	26513	24944	271514	271864	270591	217993	219083	217441	229757	230854	229208	226184	227080	225535	245201	246782	244895	210064	211149	209509
00:53:00	37	25628	26545	24992	270109	271267	269591	218901	219695	218201	230672	231440	229958	226503	227215	225761	246903	247180	245944	210994	211965	210382
00:54:00	37	25631	26552	24997	269688	271033	269263	219225	220108	218569	231033	232130	230484	226220	227622	225824	246416	247565	245893	212071	212928	211402
00:55:00	37	25586	26537	24968	271250	271721	270388	219276	220382	218732	231577	232175	230778	227732	228364	226950	246757	248106	246334	212375	213127	211653
00:56:00	37	25629	26559	25000	270965	271874	270322	219927	220705	219219	231102	232554	230731	227946	228819	227285	248396	248530	247365	211846	212970	211311
00:57:00	37	25665	26571	25024	270367	271703	269938	220008	221002	219408	232288	232628	231360	227262	228019	226543	246927	248268	246500	212512	213562	211940
00:58:00	37	25610	26577	25000	271250	271796	270425	220130	220989	219462	231741	233260	231404	226754	228657	226609	247241	248548	246798	214152	214950	213453
00:59:00	37	25666	26565	25021	270681	271666	270076	220165	221257	219614	232964	233435	232102	229522	228975	228150	249448	249732	248492	215160	216014	214489
01:00:00	37	25616	26560	24994	270214	271279	269649	220829	221604	220119	232602	233654	232031	227327	229481	227308	249267	250622	248848	215482	216505	214896
01:01:00	37	25614	26552	24989	270777	271803	270193	220961	221965	220365	232665	233908	232189	229178	229637	228310	249964	250614	249191	215966	216839	215305
01:02:00	37	25662	26587	25030	271734	272297	270918	221224	222148	220589	233752	234086	232821	229819	230634	229129	249856	251071	249366	216382	217442	215814
01:03:00	37	25677	26593	25041	271337	272723	270933	221432	222337	220787	232827	234239	232436	229498	230569	228936	250538	251209	249776	217180	217960	216473
01:04:00	37	25649	26615	25038	272126	272464	271197	221475	222394	220837	233824	234833	233231	229813	230959	229288	250297	251317	249709	217309	218286	216700
01:05:00	37	25746	26652	25105	271327	273046	271090	221546	222560	220955	235063	235388	234128	230725	231087	229808	250458	251594	249929	217476	218416	216849
01:06:00	37	25733	26648	25097	273084	273325	272106	221974	222831	221305	233951	235616	233687	229692	231240	229369	251309	251912	250513	217846	218818	217235
01:07:00	37	25663	26648	25062	272345	273490	271820	222124	223060	221494	234965	235200	233985	230816	231394	230007	250749	251649	250102	218475	219382	217831
01:08:00	37	25771	26629	25106	272111	273239	271577	222223	223187	221608	234014	235540	233680	231000	232056	230431	250500	252041	250174	218936	219799	218270
01:09:00	37	25660	26663	25068	272890	273640	272168	222443	223336	221792	235125	235709	234319	231271	232051	230563	252640	252937	251691	219080	220118	218501
01:10:00	37	25780	26662	25127	272897	273803	272252	222567	223547	221959	235380	236461	234823	231192	232318	230658	252132	253078	251508	219547	220374	218863
01:11:00	37	25744	26688	25122	272453	273445	271851	222818	223664	222143	235911	236814	235265	232090	233176	231535	251335	252723	250932	219734	220737	219138
01:12:00	37	25734	26673	25110	272169	273026	271500	222849	223888	222271	236103	236788	235348	233021	233261	232043	252430	252916	251575	220256	221203	219632
01:13:00	37	25776	26708	25148	271946	273032	271392	223307	224194	222653	235672	237201	235340	231238	232816	230931	252265	253431	251751	220885	221767	220229
01:14:00	37	25804	26715	25165	272544	273429	271889	223584	224481	222935	237201	237392	236199	232050	232985	231420	252874	253867	252273	221201	222123	220564
01:15:00	37	25746	26698	25128	272914	273568	272143	223589	224544	222969	236292	237824	235961	233212	233538	232277	253547	254075	252713	221354	222305	220732
01:16:00	37	25766	26678	25128	272547	273990	272172	223629	224549	222992	237175	237769	236374	232427	234219	232227	252854	254388	252524	221604	222585	220997
01:17:00	37	25780	26748	25171	274160	274886	273425	223728	224682	223107	237073	238112	236495	234462	234722	233494	254066	254417	253143	221974	222701	221240
01:18:00	37	25931	26817	25280	274494	274859	273578	224037	224979	223411	237140	238009	236477	234041	235127	233487	253417	254692	252957	221906	223216	221464
01:19:00	37	25927	26901	25320	272679	274509	272498	224443	225338	223793	237269	238378	236726	233721	234862	233194	253913	254910	253314	223224	223832	222430
01:20:00	37	26005	26891	25354	274451	275077	273666	224699	225667	224085	238082	238905	237396	234252	234900	233478	254547	254997	253674	223330	224330	222732
01:21:00	37	25904	26861	25289	275056	275516	274188	224975	225834	224307	238126	238879	237405	233932	235017	233377	253547	255090	253222	223399	224419	222811
01:22:00	37	25885	26823	25260	273302	274624	272866	225010	226036	224426	237211	238367	236691	234355	235528	233844	254750	255321	253937	223804	224599	223104
01:23:00	37	25901	26792	25252	273496	274856	273079	225378	226252	224717	237220	237969	236497	235315	235616	234368	254855	255793	254226	223885	224974	223332
01:24:00	37	25825	26828	25233	275380	275416	274300	225545	226486	224918	237416	238823	237023	233777	235053	233318	254765	255857	254214	224564	225401	223885
01:25:00	37	25999	26857	25333	273693	275136	273318	225641	226562	225004	239189	239485	238239	234053	235498	233679	255304	256066	254587	224919	225828	224276
01:26:00	37	25921	26886	25310	273621	274720	273073	225684	226619	225054	238372	239519	237848	236425	236378	235304	255419	256595	254910	225127	226169	224550
01:27:00	37	25946	26891	25325	274372	274702	273439	225811	226778	225197	238204	239437	237723	235177	236877	234931	256031	256442	255139	225616	226398	224909
01:28:00	37	26034	26940	25393	273197	274706	272855	226110	226990	225453	239401	239968	238587	236002	236449	235128	255198	256902	254953	225522	226483	224905
01:29:00	37	25985	26907	25352	274356	275193	273677	226252	227233	225645	239152	240218	238588	235617	236965	235194	257041	257385	256115	225722	226855	225191
01:30:00	37	25893	26850	25278	275361	275873	274519	226500	227385	225845	238887	239622	238157	236380	236827	235506	256667	257610	256041	226744	227435	225992
01:31:00	37	25955	26901	25334	274820	276383	274505	226533	227483	225911	238458	239910	238087	235787	237253	235423	256029	257321	255578	226754	227687	226123
01:32:00	37	26064	26938	25407	276226	276849	275440	226571	227487	225931	240007	240450	239131	236978	237557	236170	256940	257660	256202	226723	227912	226220
01:33:00	37	25934	26899	25323	275696	275942	274721	226607	227562	225987	239603	240502	238955	236849	237712	236183	257007	257694	256253	227603	228173	226790
01:34:00	37	25945	26897	25327	272940	275260	273004	226809	227747	226181	239005	240387	238599	236406	237730	235971	256294	257827	255963	227337	228564	226854
01:35:00	37	26078	26975	25432	275661	275578	274522	227063	227968	226418	240346	240967	239559	237453	238123	236690	257717	258132	256826	228076	228928	227404
01:36:00	37	26071	27008	25446	275359	276703	274934	227169	228079	226527	240495	241366	239833	237212	237840	236428	257172	258110	256543	228512	229327	227822
01:37:00	37	26062	27015	25445	275359	275708	274436	227225	228239	226635	239933	240906	239322	235945	237590	235671	256580	257901	256143	228259	229274	227669
01:38:00	37	26114	27004	25465	274172	276329	274155	227572	228417	226897	239845	241016	239333	237445	237730	236490	257782	258439	257013	228287	229222	227657
01:39:00	37	26028	27006	25424	277096	276592	275746	227582	228517	226952	240931	241595	240165	237178	238571	236778	258074	258935	257407	228581	229546	227966
01:40:00	37	26084	26967	25431	275126	277045	274989	227630	228652	227043	241088	242076	240484	238146	238859	237405	257950	259234	257495	229083	229951	228419
01:41:00	37	26013	26992	25409	276004	276488	275148	228041	228860	227353	241326	242479	240805	237959	238587	237175	258720	259058	257791	229344	230296	228722
01:42:00	37	26103	27006	25460	275948	277101	275427	228082	229099	227493	241993	242343	241070	236767	238357	236465	257571	259098	257237	229655	230607	229033
01:43:00	37	26078	26989	25439	276389	277120	275657	228330	229184	227659	240851	242565	240612	238251	238821	237438	258611	259291	257853	230066	231004	229437
01:44:00	37	25991	26988	25396	276170	277377	275676	228358	229363	227763	242439	242806	241525	238402	238990	237598	259000	259946	258375	230385	231217	229703
01:45:00	37	26128	26966	25453	276466	276920	275595	228642	229520	227983	242156	243222	241592	237426	239152	237193	258828	259497	258065	230344	231471	229810
01:46:00	37	26000	27026	25420	275235	276697	274869	228789	229755	228174	241976	243021	241401	239536	239935	238638	258015	259453	257637	230831	231458	230047
01:47:00	37	26198	27076	25543	276003	276694	275251	229024	229944	228386	242299	243103	241603	239665	240545	239007	259537	260362	258852	230443	231724	229986
01:48:00	37	26207	27122	25570	276102	276867	275387	229166	230078	228524	242190	243206	241600	238948	240099	238426	260456	260982	259621	231318	232028	230575
01:49:00	37	26131	27123	25534	275661	276968	275217	229166	230116	228544	242198	242931	241467	239120	240010	238467	259072	260165	258521	231515	232441	230881
01:50:00	37	26262	27139	25606	276751	277603	276080	229202	230126	228567	241884	243185	241437	239355	240214	238687	258412	259649	257933	231670	232795	231135
01:51:00	37	26177	27112	25551	277058	277463	276162	229227	230138	228585	243122	243862	242395	239311	240209	238662	259613	260357	258888	232476	233205	231743
01:52:00	37	26084	27040	25468	275185	276725	274858	229273	230265	228671	243471	244223	242749	239488	240756	239025	260239	261029	259536	232364	233308	231738
01:53:00	37	26144	27081	25518	275877	276625	275153	229610	230487	228951	242713	243817	242168	240776	241233	239906	260030	261197	259516	232123	233151	231540
01:54:00	37	26227	27113	25576	276777	277858	276220	229800	230769	229187	242714	243686	242102	240131	241256	239596	260375	261047	259613	232395	233248	231724
01:55:00	37	26137	27114	25532	277665	278075	276772	230040	230918	229381	243320	244268	242697	240044	241051	239450	259908	260972	259343	232691	233737	232117
01:56:00	37	26199	27095	25553	276576	278223	276303	230089	231082	229488	243900	244656	243180	240748	241818	240185	260286	261524	259808	233434	234272	232755
01:57:00	37	26196	27175	25592	277620	277815	276620	230329	231222	229678	243619	244717	243070	241591	241917	240656	261610	261931	260673	233705	234576	233043
01:58:00	37	26322	27177	25655	276548	278090	276222	230413	231316	229767	243687	244471	242981	240303	242004	240057	260404	261631	259920	233669	234734	233104
01:59:00	37	26206	27217	25618	277696	278530	277015	230438	231492	229868	243370	244448	242811	241674	242212	240845	260306	261803	259958	234194	235071	233535
02:00:00	37	26365	27269	25723	278277	279155	277618	230829	231703	230168	243646	244528	242989	241515	242514	240917	261496	262095	260697	234589	235525	233959

## Sheet: Figure 3d
Time(h:mm:ss)	T° 485/20,528/20	Negative	Negative	Negative	Output-before	Output-before	Output-before	Positive	Positive	Positive	Output-after	Output-after	Output-after
00:00:00	37	25158	27486	25851	24867	27320	25626	42877	42407	42147	34000	36128	34584
00:01:00	37	25136	27538	25868	34284	36479	34903	75430	83585	79116	36681	39536	37639
00:02:00	37	25189	27528	25888	45018	47226	45639	121994	123859	122434	41650	43829	42258
00:03:00	37	25138	27462	25830	56865	59323	57611	166032	167396	166219	46931	49174	47570
00:04:00	37	24948	27328	25669	71284	73943	72130	196682	198485	197090	52552	54780	53182
00:05:00	37	24901	27262	25612	88481	90546	89024	214595	217313	215463	59797	62317	60574
00:06:00	37	24944	27274	25639	105069	107607	105850	226812	229482	227655	71385	73957	72186
00:07:00	37	24908	27252	25610	120996	123002	121507	236087	238115	236607	88062	90441	88763
00:08:00	37	24867	27255	25592	134026	136579	134812	241449	243968	242216	107996	110253	108634
00:09:00	37	24982	27295	25668	145946	148256	146610	245691	248217	246461	129034	131463	129758
00:10:00	37	24985	27367	25707	156187	158522	156863	249642	251660	250157	150125	152427	150784
00:11:00	37	25047	27355	25730	164653	167026	165347	252092	254983	253046	169313	171437	169882
00:12:00	37	24977	27383	25712	171437	173561	172006	255716	257446	256086	185215	187669	185950
00:13:00	37	25086	27389	25767	176381	178976	177187	256889	259702	257803	199099	201449	199781
00:14:00	37	25045	27426	25767	181976	184497	182745	259231	261396	259820	211030	213403	211724
00:15:00	37	25080	27418	25779	187863	189877	188377	260972	263436	261711	221090	223429	221766
00:16:00	37	25065	27394	25759	191702	194297	192508	262515	264735	263131	229110	231372	229748
00:17:00	37	25028	27465	25779	195088	197113	195607	262948	265176	263569	235063	237483	235780
00:18:00	37	25252	27470	25888	196773	199436	197613	262890	265529	263717	239966	242282	240631
00:19:00	37	25018	27495	25790	199309	201599	199961	264390	266804	265104	244029	246541	244792
00:20:00	37	25163	27419	25819	201613	203866	202247	266136	268048	266598	247865	250017	248448
00:21:00	37	25052	27472	25794	203316	205822	204077	266080	268872	266984	250214	252608	250918
00:22:00	37	25156	27465	25840	205191	207309	205757	267299	269414	267863	252133	254604	252876
00:23:00	37	25141	27506	25854	206207	208860	207042	267728	270068	268405	254180	256401	254797
00:24:00	37	25166	27535	25881	208049	210093	208577	268052	270656	268861	255511	257924	256224
00:25:00	37	25224	27518	25900	208881	211561	209729	269081	270988	269540	256801	259160	257487
00:26:00	37	25102	27533	25850	210452	212442	210953	268673	271456	269572	258002	260346	258681
00:27:00	37	25252	27533	25921	210677	213228	211460	269869	272090	270486	258970	261286	259635
00:28:00	37	25191	27589	25921	211686	214170	212436	270665	272774	271226	259644	262046	260352
00:29:00	37	25247	27560	25933	213275	215285	213786	270576	273403	271497	260366	262678	261028
00:30:00	37	25204	27587	25927	213690	216399	214553	271937	273916	272432	260878	263231	261561
00:31:00	37	25285	27629	25987	215153	217281	215724	271534	273731	272139	261382	263764	262080
00:32:00	37	25336	27679	26037	215713	218072	216400	270490	273371	271438	262056	264426	262748
00:33:00	37	25288	27612	25979	216017	218428	216730	271724	273664	272200	262718	264996	263364
00:34:00	37	25171	27588	25911	216615	218981	217305	271975	274589	272789	262966	265358	263669
00:35:00	37	25333	27638	26014	217352	219689	218028	272775	274838	273313	263245	265601	263930
00:36:00	37	25356	27721	26069	217900	220142	218528	272585	275120	273359	263521	265840	264187
00:37:00	37	25364	27682	26052	218097	220677	218895	273221	275783	274009	263701	266134	264424
00:38:00	37	25316	27754	26067	219053	221210	219638	274352	276050	274706	264061	266304	264689
00:39:00	37	25561	27798	26207	219212	221593	219910	273183	276301	274250	263919	266229	264581
00:40:00	37	25435	27904	26202	219286	221618	219959	274539	276340	274945	263850	266478	264671
00:41:00	37	25604	27825	26241	219638	222210	220432	274298	277003	275158	264907	267042	265481
00:42:00	37	25354	27822	26120	220852	222897	221381	274755	276682	275224	264912	267163	265544
00:43:00	37	25493	27767	26158	220930	223456	221700	274073	276896	274992	264210	266729	264976
00:44:00	37	25468	27893	26212	221440	223783	222119	275363	277595	275985	264309	266666	264994
00:45:00	37	25630	27892	26289	221914	224167	222547	276229	278353	276797	264758	267097	265434
00:46:00	37	25470	27893	26213	221977	224433	222712	275662	278080	276378	265036	267331	265690
00:47:00	37	25523	27830	26205	222400	224722	223068	275297	277845	276078	264758	267058	265415
00:48:00	37	25483	27858	26201	222727	225045	223393	275986	278214	276606	264187	266648	264924
00:49:00	37	25556	27918	26267	222836	225219	223535	276285	278523	276910	264177	266404	264797
00:50:00	37	25668	27984	26355	222991	225315	223660	276181	278680	276938	264296	267013	265162
00:51:00	37	25612	27974	26323	223077	225394	223743	276985	279576	277788	265553	267298	265931
00:52:00	37	25584	27954	26299	223290	225805	224055	278277	280031	278659	264692	267558	265633
00:53:00	37	25648	27984	26346	224222	226432	224834	276835	279419	277634	265530	267749	266146
00:54:00	37	25650	27991	26350	224554	226856	225212	276402	279178	277298	265870	267910	266396
00:55:00	37	25607	27977	26322	224607	227138	225380	278006	279885	278451	265052	267914	265991
00:56:00	37	25650	28001	26355	225276	227470	225880	277714	280042	278385	266047	268021	266540
00:57:00	37	25688	28013	26380	225360	227776	226075	277101	279868	277992	265868	268302	266592
00:58:00	37	25630	28018	26355	225484	227761	226129	278006	279962	278490	265923	268520	266729
00:59:00	37	25688	28011	26379	225520	228042	226288	277420	279752	278093	266656	268447	267057
01:00:00	37	25637	27996	26346	226204	228482	226850	276942	279368	277662	265642	268232	266444

## Sheet: Figure 4b
Time(h:mm:ss)	T° 485/20,528/20	T=6nt	T=6nt	T=6nt	T=9nt	T=9nt	T=9nt	T=12nt	T=12nt	T=12nt	T=15nt	T=15nt	T=15nt	T=20nt	T=20nt	T=20nt	T=25nt	T=25nt	T=25nt	T=30nt	T=30nt	T=30nt
00:00:00	37	20876	21474	19943	16156	16558	15124	15617	16150	14652	18742	20018	18157	14551	14973	13530	10436	10681	9325	17801	18949	17150
00:01:00	37	27662	28967	27088	21470	22410	20711	18027	18463	17012	33724	33673	32465	16775	17286	15799	12698	12941	11586	31858	31941	30665
00:02:00	37	36031	37623	35602	28147	29270	27480	20599	21391	19765	41039	43146	40872	19355	20015	18454	15297	15780	14306	39098	40914	38782
00:03:00	37	45834	47738	45562	35872	37354	35387	23993	24915	23224	45537	47469	45279	22346	23115	21500	18543	19218	17650	43059	45022	42818
00:04:00	37	55780	58286	55813	44019	45921	43746	28042	29072	27328	47988	50115	47829	25751	26870	25083	22410	23130	21539	45361	47214	45063
00:05:00	37	65418	68355	65669	51957	54167	51839	32194	33547	31643	49528	51780	49433	29972	30998	29255	26207	27255	25502	46264	48417	46119
00:06:00	37	73975	77263	74403	58911	61577	59025	36566	38027	36069	50856	53014	50712	33815	35304	33334	30222	31437	29601	47177	49155	46942
00:07:00	37	80917	84680	81586	64953	67810	65163	40661	42441	40327	51697	54036	51646	37874	39395	37408	34188	35523	33628	47821	49963	47670
00:08:00	37	86807	90881	87633	69795	73049	70207	44601	46403	44277	52584	54850	52495	41518	43275	41172	37662	39282	37246	48685	50818	48529
00:09:00	37	91886	96116	92791	74023	77363	74478	47848	50077	47741	53311	55738	53304	44785	46733	44535	40899	42589	40518	49559	51632	49372
00:10:00	37	95885	100419	96944	77376	80940	77944	51158	53242	50977	54236	56578	54186	47788	49833	47587	43614	45478	43322	50109	52439	50053
00:11:00	37	99112	103627	100161	80134	83862	80785	53637	56141	53669	54903	57355	54909	50411	52682	50325	46003	48063	45810	51031	53144	50864
00:12:00	37	101304	106239	102567	82495	86282	83176	56187	58605	56174	55494	57948	55500	52895	55134	52792	48319	50317	48094	51500	53814	51436
00:13:00	37	103622	108400	104804	84284	88161	85010	58222	60854	58318	55977	58455	55995	54786	57319	54833	50019	52285	49930	52101	54467	52063
00:14:00	37	105211	110083	106441	85616	89623	86408	60043	62733	60169	56413	58944	56459	56675	59084	56658	51734	53991	51640	52853	55048	52728
00:15:00	37	106227	111404	107612	86889	90942	87705	61588	64316	61733	56965	59486	57005	57980	60652	58097	53240	55588	53192	52961	55310	52914
00:16:00	37	107673	112593	108926	88078	92103	88879	62798	65695	63029	57544	60185	57645	59370	62004	59467	54512	56915	54492	53136	55640	53168
00:17:00	37	108577	113797	109984	88929	93148	89829	64050	66855	64234	58235	60700	58246	60565	63263	60695	55552	58036	55573	53947	56174	53838
00:18:00	37	109652	114788	111015	89926	94028	90766	64952	67986	65252	58278	60900	58369	61534	64320	61709	56480	58959	56499	54196	56640	54198
00:19:00	37	110464	115609	111832	90611	94929	91561	66060	68974	66299	58406	61181	58575	62445	65230	62619	57214	59798	57286	54450	56848	54428
00:20:00	37	110965	116338	112449	91439	95561	92289	66839	69920	67163	59133	61530	59109	63224	66144	63466	58039	60650	58125	54762	57246	54784
00:21:00	37	111840	117004	113217	91765	96175	92762	67611	70623	67900	59123	61971	59330	64073	66838	64236	58844	61392	58898	55328	57747	55316
00:22:00	37	112251	117574	113709	92474	96714	93384	68132	71283	68492	59792	62380	59866	64411	67438	64708	59279	62049	59446	55702	58159	55710
00:23:00	37	112649	118011	114127	92969	97323	93937	68784	71889	69119	60293	63040	60448	65063	67938	65282	59905	62405	59934	55834	58271	55832
00:24:00	37	113237	118571	114701	93448	97811	94420	69318	72458	69671	60770	63406	60868	65533	68546	65822	59970	62891	60214	55855	58456	55936
00:25:00	37	113755	119109	115229	93915	98284	94891	69737	72918	70111	60872	63688	61062	66061	69000	66313	60754	63295	60804	56366	58768	56345
00:26:00	37	114121	119523	115619	94346	98807	95368	70199	73445	70606	61255	63992	61404	66354	69396	66658	60934	63745	61121	56628	59211	56700
00:27:00	37	114498	119938	116015	94876	99212	95834	70797	73946	71155	61634	64399	61798	66694	69691	66975	61237	63974	61387	57063	59571	57097
00:28:00	37	114964	120376	116467	95016	99516	96058	71087	74402	71530	61882	64621	62032	66959	70041	67283	61539	64301	61701	57385	59984	57465
00:29:00	37	115299	120724	116809	95338	99795	96358	71500	74688	71877	61922	64759	62122	67318	70315	67599	61855	64663	62040	57671	60124	57676
00:30:00	37	115549	121101	117123	95733	100198	96757	71657	74994	72110	62158	64943	62332	67433	70517	67758	62234	64971	62383	57530	60237	57665
00:31:00	37	116067	121469	117565	96072	100551	97103	72017	75281	72433	62404	65174	62570	67601	70674	67920	62426	65337	62664	57885	60384	57914
00:32:00	37	116249	121769	117807	96333	100849	97383	72308	75614	72746	62596	65497	62829	67843	70930	68170	62881	65607	63024	58079	60695	58167
00:33:00	37	116483	122056	118068	96637	101192	97707	72537	75839	72972	63089	65840	63245	68127	71213	68453	62922	65818	63153	58378	61042	58491
00:34:00	37	116939	122393	118463	96981	101388	97975	72680	75995	73122	63310	66278	63577	68346	71437	68674	63052	65847	63231	58781	61257	58798
00:35:00	37	117110	122691	118699	96975	101731	98148	72855	76255	73340	63700	66351	63805	68490	71633	68845	63081	65958	63301	58657	61448	58835
00:36:00	37	117384	122966	118974	97679	102052	98656	73261	76516	73672	63428	66575	63786	68712	71808	69043	63324	66216	63552	59057	61569	59092
00:37:00	37	117731	123254	119290	97714	102351	98825	73331	76747	73824	64132	66829	64260	68825	71952	69172	63709	66496	63883	59138	61850	59275
00:38:00	37	117843	123438	119439	97907	102573	99033	73564	76924	74029	64256	67186	64504	68953	72147	69334	63747	66684	63998	59494	62180	59618
00:39:00	37	117981	123574	119576	98382	102809	99386	73780	77108	74228	64440	67433	64720	69248	72295	69554	63913	66773	64125	59971	62581	60056
00:40:00	37	118246	123876	119860	98349	103179	99559	73872	77370	74407	64995	67903	65231	69219	72476	69632	63993	66859	64208	60151	62933	60324
00:41:00	37	118672	124246	120257	99017	103502	100050	74280	77517	74682	65309	68126	65498	69527	72618	69855	64036	67005	64303	60463	63021	60521
00:42:00	37	118959	124678	120618	99099	103723	100203	74151	77710	74717	65101	68246	65458	69636	72845	70025	64331	67096	64494	60378	63332	60639
00:43:00	37	119339	124824	120878	99023	103777	100194	74468	77735	74885	65604	68440	65803	69823	72994	70192	64292	67401	64631	61067	63559	61091
00:44:00	37	119120	124938	120830	99426	104021	100516	74395	77934	74951	65803	68857	66113	69928	73080	70288	64886	67630	65038	60951	63842	61179
00:45:00	37	119500	125091	121093	99672	104337	100797	74706	78018	75146	66148	69086	66399	69884	73106	70279	64790	67775	65065	61227	63902	61345
00:46:00	37	119742	125417	121378	99838	104539	100982	74721	78238	75266	66245	69268	66539	69980	73133	70340	64778	67732	65038	61361	64146	61535
00:47:00	37	119909	125570	121538	100077	104781	101222	74992	78365	75463	66343	69323	66615	70065	73336	70485	64987	67944	65248	61648	64452	61832
00:48:00	37	120068	125868	121768	100307	104949	101420	75040	78472	75541	66439	69520	66763	70365	73436	70683	65251	68130	65472	62058	64812	62216
00:49:00	37	120539	126093	122113	100315	105068	101485	75099	78626	75649	66814	69753	67065	70225	73550	70673	65183	68142	65445	62183	64892	62318
00:50:00	37	120437	126266	122152	100569	105337	101746	75490	78880	75970	66955	70092	67308	70498	73669	70867	65191	68235	65496	62025	64982	62287
00:51:00	37	120662	126326	122292	100992	105601	102088	75605	79090	76133	67344	70276	67591	70643	73821	71016	65546	68393	65751	62565	65317	62722
00:52:00	37	120794	126532	122462	100937	105767	102146	75642	79070	76141	67334	70507	67705	70585	73874	71014	65452	68451	65734	62916	65674	63076
00:53:00	37	121053	126880	122767	101188	105941	102358	75612	79197	76191	67650	70621	67917	70715	73852	71066	65430	68417	65706	62902	65830	63149
00:54:00	37	121550	127110	123127	101468	106156	102604	75997	79376	76471	67699	70858	68062	70625	73942	71069	65572	68503	65819	63192	65983	63368
00:55:00	37	121433	127503	123271	101434	106229	102625	75982	79485	76519	67998	71016	68290	70876	74035	71239	65660	68648	65937	63397	66317	63639
00:56:00	37	122138	127591	123660	101560	106369	102759	75965	79493	76515	68113	71269	68475	70941	74236	71373	65875	68933	66187	63760	66567	63945
00:57:00	37	121656	127603	123431	101924	106684	103097	76162	79641	76687	68382	71415	68681	71103	74266	71468	66211	68991	66382	63833	66738	64068
00:58:00	37	121774	127608	123491	102121	106807	103256	76325	79810	76853	68451	71649	68834	70981	74275	71413	65813	69051	66217	63937	66807	64154
00:59:00	37	122318	127878	123895	102020	107078	103346	76394	79936	76951	68791	71854	69105	71084	74369	71511	66249	69130	66471	64110	67065	64370
01:00:00	37	122480	128405	124243	102690	107396	103835	76528	80029	77064	68901	72052	69260	71289	74510	71683	66207	69222	66497	64558	67446	64784

## Sheet: Figure 4e
Time(h:mm:ss)	T° 485/20,528/20	a=16nt	a=16nt	a=16nt	a=14nt	a=14nt	a=14nt	a=25nt	a=25nt	a=25nt	a=22nt	a=22nt	a=22nt	a=19nt	a=19nt	a=19nt	a=0nt	a=0nt	a=0nt	a=11nt	a=11nt	a=11nt
00:00:00	37	74652	72716	75467	112197	110261	111326	49118	47182	48118	60633	58697	61168	106022	104086	107465	139799	137863	137220	108208	106272	109695
00:01:00	37	97140	95204	98405	126563	124627	125692	65590	63654	64755	74685	72749	75501	122301	120365	124069	157038	155102	154287	136778	134842	138836
00:02:00	37	109052	107116	110555	138625	136689	137754	76226	74290	75498	83803	81867	84801	128747	126811	130644	171513	169577	168617	151243	149307	153590
00:03:00	37	117052	115116	118715	147424	145488	146553	82209	80273	81540	88658	86722	89754	134300	132364	136308	182072	180136	179070	162760	160824	165338
00:04:00	37	124158	122222	125964	153670	151734	152799	86800	84864	86177	93931	91995	95132	139434	137498	141545	189568	187632	186491	171363	169427	174113
00:05:00	37	131223	129287	133170	158036	156100	157165	92084	90148	91514	98860	96924	100160	141471	139535	143623	194806	192870	191677	176728	174792	179585
00:06:00	37	139601	137665	141715	160837	158901	159966	94996	93060	94455	100948	99012	102289	143483	141547	145675	198169	196233	195006	177549	175613	180422
00:07:00	37	144254	142318	146461	161746	159810	160875	96382	94446	95855	101853	99917	103212	143638	141702	145833	199259	197323	196085	178616	176680	181511
00:08:00	37	147996	146060	150278	162061	160125	161190	96552	94616	96027	102066	100130	103430	143871	141935	146071	199636	197700	196459	178654	176718	181549
00:09:00	37	149423	147487	151734	163234	161298	162363	95956	94020	95425	101356	99420	102706	142824	140888	145003	201043	199107	197852	178573	176637	181467
00:10:00	37	150059	148123	152383	162595	160659	161724	95528	93592	94993	101197	99261	102543	143496	141560	145688	200277	198341	197093	178274	176338	181162
00:11:00	37	148924	146988	151225	163006	161070	162135	95449	93513	94913	101075	99139	102419	144439	142503	146650	200772	198836	197583	178439	176503	181330
00:12:00	37	149598	147662	151912	162844	160908	161973	95475	93539	94939	101098	99162	102442	143640	141704	145835	200576	198640	197389	177625	175689	180500
00:13:00	37	150670	148734	153006	162593	160657	161722	95566	93630	95031	101524	99588	102877	143595	141659	145789	200275	198339	197091	177678	175742	180554
00:14:00	37	150518	148582	152851	161622	159686	160751	95325	93389	94788	101556	99620	102910	145085	143149	147309	199109	197173	195937	180747	178811	183684
00:15:00	37	150566	148630	152900	163302	161366	162431	95634	93698	95100	101833	99897	103192	144000	142064	146202	201126	199190	197934	179110	177174	182015
00:16:00	37	150001	148065	152323	162844	160908	161973	95632	93696	95098	102251	100315	103618	145194	143258	147420	200576	198640	197389	180605	178669	183540
00:17:00	37	151585	149649	153939	162864	160928	161993	95847	93911	95315	102542	100606	103915	146002	144066	148244	200602	198666	197415	179736	177800	182653
00:18:00	37	151379	149443	153729	163087	161151	162216	95708	93772	95174	102930	100994	104311	145181	143245	147407	200868	198932	197678	180653	178717	183588
00:19:00	37	151466	149530	153818	162763	160827	161892	95814	93878	95281	103358	101422	104748	145305	143369	147534	200478	198542	197292	181670	179734	184626
00:20:00	37	153006	151070	155389	162666	160730	161795	95855	93919	95323	103074	101138	104458	144986	143050	147208	200361	198425	197176	181685	179749	184641
00:21:00	37	153060	151124	155444	162499	160563	161628	96478	94542	95952	103419	101483	104810	144649	142713	146864	200163	198227	196980	181044	179108	183987
00:22:00	37	151613	149677	153968	163277	161341	162406	96301	94365	95773	103736	101800	105133	145751	143815	147988	201096	199160	197904	181652	179716	184607
00:23:00	37	152793	150857	155171	164014	162078	163143	96364	94428	95837	104184	102248	105590	145320	143384	147549	201980	200044	198779	182632	180696	185607
00:24:00	37	152781	150845	155159	162745	160809	161874	96460	94524	95934	104141	102205	105546	145703	143767	147939	200455	198519	197269	183175	181239	186161
00:25:00	37	151640	149704	153995	162991	161055	162120	96648	94712	96124	104116	102180	105521	146717	144781	148974	200751	198815	197563	182774	180838	185752
00:26:00	37	152180	150244	154546	162238	160302	161367	96825	94889	96303	104068	102132	105472	146930	144994	149191	199849	197913	196670	182569	180633	185543
00:27:00	37	152755	150819	155133	162988	161052	162117	96792	94856	96269	104602	102666	106016	146886	144950	149146	200751	198815	197563	183132	181196	186117
00:28:00	37	152596	150660	154970	163741	161805	162870	96777	94841	96254	104476	102540	105888	145870	143934	148110	201653	199717	198456	182916	180980	185897
00:29:00	37	152847	150911	155226	163997	162061	163126	96800	94864	96277	104810	102874	106229	146255	144319	148503	201960	200024	198759	182564	180628	185538
00:30:00	37	152918	150982	155299	162803	160867	161932	96899	94963	96377	104863	102927	106283	147198	145262	149464	200528	198592	197342	182473	180537	185445
00:31:00	37	152733	150797	155110	163295	161359	162424	96993	95057	96472	104899	102963	106319	147363	145427	149633	201116	199180	197924	183595	181659	186589
00:32:00	37	153726	151790	156123	162907	160971	162036	96917	94981	96395	104967	103031	106389	147479	145543	149751	200650	198714	197463	184191	182255	187197
00:33:00	37	152816	150880	155195	162306	160370	161435	96987	95051	96466	105086	103150	106510	147378	145442	149648	199930	197994	196750	183215	181279	186202
00:34:00	37	153189	151253	155575	163323	161387	162452	97152	95216	96633	104929	102993	106350	147322	145386	149591	201149	199213	197957	184267	182331	187275
00:35:00	37	153300	151364	155688	162727	160791	161856	97261	95325	96743	105363	103427	106793	147082	145146	149346	200437	198501	197252	184313	182377	187322
00:36:00	37	153176	151240	155562	162793	160857	161922	97200	95264	96681	104727	102791	106144	146993	145057	149255	200516	198580	197330	184163	182227	187169
00:37:00	37	153348	151412	155737	163467	161531	162596	97157	95221	96638	105350	103414	106779	147378	145442	149648	201324	199388	198130	183639	181703	186634
00:38:00	37	154400	152464	156810	162438	160502	161567	97084	95148	96564	105195	103259	106621	146912	144976	149173	200090	198154	196908	183583	181647	186577
00:39:00	37	153683	151747	156079	162699	160763	161828	97347	95411	96830	105317	103381	106746	146957	145021	149219	200402	198466	197217	183631	181695	186626
00:40:00	37	153564	151628	155958	162600	160664	161729	97058	95122	96538	105436	103500	106867	146681	144745	148937	200282	198346	197098	184280	182344	187288
00:41:00	37	154643	152707	157058	163112	161176	162241	97107	95171	96587	105558	103622	106992	148356	146420	150646	200898	198962	197708	185098	183162	188122
00:42:00	37	153680	151744	156076	163062	161126	162191	97601	95665	97086	105614	103678	107049	148161	146225	150447	200837	198901	197648	184786	182850	187804
00:43:00	37	153452	151516	155843	162874	160938	162003	97248	95312	96730	105337	103401	106766	148389	146453	150679	200609	198673	197422	184186	182250	187192
00:44:00	37	153987	152051	156389	162258	160322	161387	97162	95226	96643	105826	103890	107265	147903	145967	150183	199872	197936	196692	185722	183786	188759
00:45:00	37	153992	152056	156394	163292	161356	162421	97606	95670	97091	105624	103688	107059	147969	146033	150251	201114	199178	197922	184594	182658	187608
00:46:00	37	154702	152766	157118	162190	160254	161319	97284	95348	96766	105809	103873	107248	147619	145683	149894	199788	197852	196609	185765	183829	188803
00:47:00	37	154871	152935	157291	163508	161572	162637	97553	95617	97038	105788	103852	107226	147406	145470	149677	201375	199439	198180	187201	185265	190267
00:48:00	37	154124	152188	156529	163926	161990	163055	97317	95381	96799	105872	103936	107312	147092	145156	149356	201876	199940	198676	185362	183426	188392
00:49:00	37	155175	153239	157601	162499	160563	161628	97499	95563	96983	105799	103863	107237	147365	145429	149635	200161	198225	196978	184715	182779	187732
00:50:00	37	154321	152385	156730	162702	160766	161831	97261	95325	96743	106108	104172	107553	147454	145518	149725	200407	198471	197222	186074	184138	189118
00:51:00	37	154583	152647	156997	162552	160616	161681	97383	95447	96866	106024	104088	107467	148450	146514	150741	200227	198291	197044	185914	183978	188955
00:52:00	37	154382	152446	156792	162803	160867	161932	97771	95835	97258	106054	104118	107497	147966	146030	150248	200526	198590	197340	184781	182845	187799
00:53:00	37	154504	152568	156916	162127	160191	161256	97461	95525	96945	106042	104106	107485	148427	146491	150718	199715	197779	196537	187201	185265	190267
00:54:00	37	155860	153924	158300	162702	160766	161831	97542	95606	97027	106290	104354	107738	147918	145982	150199	200407	198471	197222	186474	184538	189526
00:55:00	37	153901	151965	156301	162438	160502	161567	97560	95624	97045	106409	104473	107860	148402	146466	150692	200090	198154	196908	187832	185896	190911
00:56:00	37	154598	152662	157012	162567	160631	161696	97788	95852	97275	106265	104329	107713	147974	146038	150256	200244	198308	197061	185306	183370	188335
00:57:00	37	154661	152725	157077	161980	160044	161109	97821	95885	97308	106642	104706	108097	148772	146836	151070	199540	197604	196364	186363	184427	189413
00:58:00	37	154608	152672	157023	162775	160839	161904	97869	95933	97357	106447	104511	107898	148769	146833	151067	200493	198557	197307	187001	185065	190063
00:59:00	37	154542	152606	156955	163148	161212	162277	97672	95736	97158	106397	104461	107847	148668	146732	150964	200941	199005	197751	186717	184781	189774
01:00:00	37	154512	152576	156925	161212	159276	160341	97672	95736	97158	106442	104506	107893	148868	146932	151168	198615	196679	195448	186958	185022	190020
01:01:00	37	154732	152796	157149	161318	159382	160447	97370	95434	96853	106381	104445	107831	148688	146752	150984	198744	196808	195576	186664	184728	189720
01:02:00	37	155011	153075	157434	162040	160104	161169	97839	95903	97327	106678	104742	108134	147953	146017	150234	199613	197677	196436	185739	183803	188776
01:03:00	37	154849	152913	157268	161554	159618	160683	97750	95814	97237	106822	104886	108281	147989	146053	150271	199026	197090	195855	185331	183395	188360
01:04:00	37	154276	152340	156684	161769	159833	160898	97753	95817	97240	107050	105114	108513	149020	147084	151323	199287	197351	196113	185149	183213	188174
01:05:00	37	154456	152520	156868	162142	160206	161271	97814	95878	97301	106959	105023	108421	148886	146950	151186	199735	197799	196557	186282	184346	189330
01:06:00	37	154722	152786	157139	161711	159775	160840	97740	95804	97227	107012	105076	108475	149013	147077	151316	199216	197280	196043	187052	185116	190115
01:07:00	37	154914	152978	157335	160867	158931	159996	97867	95931	97355	106840	104904	108299	148409	146473	150700	198205	196269	195042	186441	184505	189492
01:08:00	37	155627	153691	158062	162268	160332	161397	97796	95860	97283	107088	105152	108552	148784	146848	151082	199885	197949	196705	187789	185853	190867
01:09:00	37	154474	152538	156886	161138	159202	160267	97869	95933	97357	107182	105246	108648	148916	146980	151217	198531	196595	195365	186309	184373	189358
01:10:00	37	155193	153257	157619	161764	159828	160893	97905	95969	97393	107055	105119	108519	148442	146506	150733	199279	197343	196105	186259	184323	189307
01:11:00	37	155553	153617	157986	162083	160147	161212	97933	95997	97422	107177	105241	108643	148688	146752	150984	199664	197728	196486	185643	183707	188678
01:12:00	37	154914	152978	157335	161526	159590	160655	97740	95804	97227	107147	105211	108612	148871	146935	151171	198995	197059	195824	188022	186086	191105
01:13:00	37	154975	153039	157397	161855	159919	160984	97626	95690	97112	107149	105213	108614	148714	146778	151011	199390	197454	196215	187455	185519	190527
01:14:00	37	155044	153108	157467	162294	160358	161423	98064	96128	97554	107000	105064	108462	149656	147720	151972	199918	197982	196738	187037	185101	190100
01:15:00	37	155302	153366	157730	162258	160322	161387	97879	95943	97367	107306	105370	108775	149180	147244	151486	199874	197938	196694	188050	186114	191133
01:16:00	37	155728	153792	158165	161744	159808	160873	98374	96438	97867	107291	105355	108759	149725	147789	152042	199256	197320	196082	187437	185501	190508
01:17:00	37	155515	153579	157948	161460	159524	160589	97877	95941	97365	107253	105317	108720	148969	147033	151271	198914	196978	195744	189439	187503	192550
01:18:00	37	154760	152824	157178	162238	160302	161367	97938	96002	97427	107294	105358	108762	148886	146950	151186	199849	197913	196670	186502	184566	189554
01:19:00	37	155188	153252	157614	161830	159894	160959	97847	95911	97335	107507	105571	108980	149403	147467	151713	199360	197424	196185	187462	185526	190534
01:20:00	37	155401	153465	157831	162053	160117	161182	97814	95878	97301	107306	105370	108775	148143	146207	150428	199629	197693	196452	187807	185871	190886
01:21:00	37	155817	153881	158256	161708	159772	160837	98021	96085	97510	107441	105505	108912	149058	147122	151362	199211	197275	196038	187212	185276	190279
01:22:00	37	155619	153683	158054	161713	159777	160842	98070	96134	97560	107405	105469	108876	149431	147495	151742	199221	197285	196048	188149	186213	191234
01:23:00	37	156247	154311	158694	161503	159567	160632	98037	96101	97527	107572	105636	109046	149899	147963	152219	198967	197031	195796	186842	184906	189901
01:24:00	37	155611	153675	158046	161404	159468	160533	98141	96205	97632	107529	105593	109002	148493	146557	150785	198851	196915	195682	189110	187174	192215
01:25:00	37	155363	153427	157793	160631	158695	159760	98128	96192	97619	107755	105819	109233	149367	147431	151677	197918	195982	194758	188296	186360	191384
01:26:00	37	156425	154489	158876	161997	160061	161126	97915	95979	97403	107458	105522	108930	148820	146884	151119	199560	197624	196383	189105	187169	192210
01:27:00	37	156876	154940	159336	162689	160753	161818	98135	96199	97626	107694	105758	109170	149611	147675	151926	200389	198453	197204	186023	184087	189066
01:28:00	37	155953	154017	158394	161632	159696	160761	98295	96359	97787	107481	105545	108953	150688	148752	153024	199124	197188	195952	187255	185319	190323
01:29:00	37	156696	154760	159152	161820	159884	160949	97791	95855	97278	107917	105981	109398	149446	147510	151757	199347	197411	196173	187153	185217	190218
01:30:00	37	155730	153794	158167	162420	160484	161549	98146	96210	97637	107958	106022	109440	149248	147312	151555	200067	198131	196885	187480	185544	190552
01:31:00	37	155467	153531	157899	161800	159864	160929	98032	96096	97522	107742	105806	109219	149780	147844	152098	199322	197386	196148	186238	184302	189285
01:32:00	37	156075	154139	158519	161716	159780	160845	97976	96040	97465	107740	105804	109217	149441	147505	151752	199223	197287	196050	188610	186674	191705
01:33:00	37	156602	154666	159056	161906	159970	161035	97910	95974	97398	107527	105591	109000	149638	147702	151953	199451	197515	196276	187612	185676	190687
01:34:00	37	156564	154628	159018	162152	160216	161281	97999	96063	97488	107912	105976	109393	149884	147948	152204	199743	197807	196565	188762	186826	191860
01:35:00	37	155748	153812	158185	162509	160573	161638	98467	96531	97961	107730	105794	109207	148969	147033	151271	200174	198238	196991	188428	186492	191519
01:36:00	37	156214	154278	158661	161343	159407	160472	97864	95928	97352	107993	106057	109475	150794	148858	153132	198775	196839	195606	186826	184890	189885
01:37:00	37	156904	154968	159364	160107	158171	159236	98287	96351	97779	108221	106285	109708	149398	147462	151708	197292	195356	194138	188061	186125	191145
01:38:00	37	155926	153990	158367	162203	160267	161332	98262	96326	97754	108333	106397	109822	150561	148625	152895	199804	197868	196625	187128	185192	190193
01:39:00	37	156959	155023	159421	161744	159808	160873	98034	96098	97524	107709	105773	109186	149666	147730	151982	199256	197320	196082	189310	187374	192419
01:40:00	37	156182	154246	158628	161962	160026	161091	98237	96301	97729	108092	106156	109576	149740	147804	152057	199515	197579	196339	188851	186915	191950
01:41:00	37	156853	154917	159312	161288	159352	160417	98442	96506	97936	108122	106186	109607	149504	147568	151816	198706	196770	195538	188742	186806	191839
01:42:00	37	155718	153782	158155	162023	160087	161152	98102	96166	97592	108107	106171	109592	149892	147956	152212	199591	197655	196414	189416	187480	192527
01:43:00	37	157547	155611	160020	161878	159942	161007	98189	96253	97680	108404	106468	109894	149236	147300	151543	199416	197480	196241	187881	185945	190961
01:44:00	37	156856	154920	159316	162846	160910	161975	98277	96341	97769	108224	106288	109711	149811	147875	152130	200579	198643	197392	187500	185564	190572
01:45:00	37	155677	153741	158113	163573	161637	162702	98333	96397	97826	108355	106419	109845	150315	148379	152644	201451	199515	198256	189137	187201	192242
01:46:00	37	157091	155155	159555	161655	159719	160784	98576	96640	98071	108150	106214	109635	149578	147642	151892	199150	197214	195978	188897	186961	191997
01:47:00	37	156136	154200	158581	163198	161262	162327	98445	96509	97939	108411	106475	109902	149709	147773	152026	201000	199064	197809	187125	185189	190190
01:48:00	37	157335	155399	159804	162580	160644	161709	98374	96438	97867	108414	106478	109905	150472	148536	152804	200260	198324	197076	189183	187247	192289
01:49:00	37	156980	155044	159442	161468	159532	160597	98442	96506	97936	108264	106328	109752	150214	148278	152541	198922	196986	195752	188088	186152	191172
01:50:00	37	155804	153868	158242	162319	160383	161448	98353	96417	97846	108713	106777	110210	150333	148397	152662	199948	198012	196768	189373	187437	192483
01:51:00	37	157081	155145	159545	161990	160054	161119	98044	96108	97534	108431	106495	109922	150454	148518	152785	199550	197614	196374	189001	187065	192103
01:52:00	37	157101	155165	159565	161838	159902	160967	98460	96524	97954	108558	106622	110052	149915	147979	152236	199368	197432	196193	187974	186038	191056
01:53:00	37	156453	154517	158904	161536	159600	160665	98381	96445	97874	108363	106427	109853	149583	147647	151897	199005	197069	195834	189553	187617	192666
01:54:00	37	155452	153516	157883	161237	159301	160366	98564	96628	98059	108713	106777	110210	150084	148148	152408	198648	196712	195481	188357	186421	191447
01:55:00	37	156982	155046	159444	161701	159765	160830	98417	96481	97910	108421	106485	109912	150667	148731	153003	199203	197267	196030	188879	186943	191979
01:56:00	37	156316	154380	158765	162187	160251	161316	98518	96582	98012	108540	106604	110033	150381	148445	152711	199788	197852	196609	190729	188793	193866
01:57:00	37	156655	154719	159111	161992	160056	161121	98827	96891	98325	108665	106729	110161	150685	148749	153021	199555	197619	196378	191096	189160	194240
01:58:00	37	157109	155173	159574	161635	159699	160764	98546	96610	98041	108670	106734	110166	149932	147996	152253	199124	197188	195952	189099	187163	192203
01:59:00	37	156260	154324	158708	161949	160013	161078	98455	96519	97949	108477	106541	109969	150538	148602	152871	199505	197569	196329	189416	187480	192527
02:00:00	37	157423	155487	159894	162869	160933	161998	98581	96645	98076	108725	106789	110222	150845	148909	153184	200604	198668	197417	189667	187731	192783

## Sheet: Figure 5a
Time(h:mm:ss)	T° 485/20,528/20	A=no B=no C=no	A=no B=no C=no	A=no B=no C=no	A=1 B=no,C=no	A=1 B=no,C=no	A=1 B=no,C=no	A=no,B=1,C=no	A=no,B=1,C=no	A=no,B=1,C=no	no,no,1	no,no,1	no,no,1	A=0,B=0,C=0	A=0,B=0,C=0	A=0,B=0,C=0	A=1,B=0,C=0	A=1,B=0,C=0	A=1,B=0,C=0	A=0,B=1,C=0	A=0,B=1,C=0	A=0,B=1,C=0	A=0,B=0,C=1	A=0,B=0,C=1	A=0,B=0,C=1	A=1,B=1,C=0	A=1,B=1,C=0	A=1,B=1,C=0	A=1,B=0,C=1	A=1,B=0,C=1	A=1,B=0,C=1	A=0,B=1,C=1	A=0,B=1,C=1	A=0,B=1,C=1	A=1,B=1,C=1	A=1,B=1,C=1	A=1,B=1,C=1
00:00:00	37	39086	40612	41283	47853	49135	47736	38153	39535	41011	39215	32412	37110	35449	35489	35865	37408	36850	36366	33632	33530	32549	51118	45333	50417	48969	47119	48480	45583	39402	40866	48274	42127	43120	33773	26650	33579
00:02:00	37	39136	40500	41251	47449	49031	47484	37925	39339	40799	57819	64359	62311	36586	39081	38250	38178	40996	38848	34444	36984	34705	54906	60538	59896	51562	55009	53740	49398	55562	50831	52624	58714	53567	36509	43183	43144
00:04:00	37	38923	40388	41089	47316	48927	47366	37415	39143	40450	99260	98479	100005	39913	42672	41712	41795	45141	42736	37566	40438	37997	66857	75744	73544	57999	62898	60925	63032	71722	65778	66681	75301	68937	50118	59717	58285
00:06:00	37	38675	40303	40924	47187	48889	47283	37442	39026	40403	147598	141243	145590	44696	46114	45806	47472	49380	47671	42119	43868	41971	87747	92391	92204	68798	70934	70301	84301	88902	84893	88082	93075	88428	72249	77466	78061
00:08:00	37	38757	40212	40918	47464	49016	47484	37413	38975	40363	170359	169144	170888	49353	49862	50004	53488	54329	53146	47066	47735	46370	110725	111669	113303	79798	79951	80301	108930	108869	107160	113481	113746	111428	98571	98491	101689
00:10:00	37	38660	40132	40830	47662	49208	47679	37571	39078	40493	183572	181543	183695	52656	53442	53446	58603	59247	58162	50782	51564	50142	134356	131227	134906	89149	89171	89587	131482	128681	128350	137144	134141	133466	122520	119665	124259
00:12:00	37	38678	40110	40827	48086	49479	48026	37670	39225	40616	191798	189832	191953	55325	56571	56347	62920	63750	62572	53777	55016	53368	151293	148136	151828	96645	97557	97529	149233	146042	145907	155975	152033	151832	141633	138552	143259
00:14:00	37	38527	40075	40736	48274	49766	48263	37927	39407	40835	197622	195184	197542	57813	59240	58927	66389	67784	66326	56709	58102	56378	164647	161881	165375	104102	105094	105026	162095	159857	159241	168658	166125	165211	155987	153789	158050
00:16:00	37	38561	40054	40742	48546	50004	48518	38180	39594	41055	200923	198988	201093	60341	61753	61447	69984	71458	69961	59380	60953	59140	172292	171614	174058	110727	112036	111810	171107	170250	168940	177541	176588	174880	166685	165698	169350
00:18:00	37	38586	40032	40743	48895	50161	48770	38321	39806	41232	204377	202218	204435	62698	64094	63796	73660	74863	73500	62495	63739	62088	179450	179019	181340	117481	118926	118633	178004	178053	176289	183941	184272	181921	174753	175146	178108
00:20:00	37	38554	40052	40737	48853	50309	48824	38509	40001	41423	207586	205229	207546	65223	66344	66182	76970	78135	76791	65040	66435	64709	183022	184374	185804	123859	125593	125156	183446	184168	182068	189462	190320	187706	182067	182905	185644
00:22:00	37	38566	40055	40745	48873	50404	48883	38730	40204	41635	209697	207518	209745	67028	68509	68169	79946	81225	79824	67706	69067	67358	188321	189003	190767	131098	132295	132125	188246	189238	187003	194391	195380	192701	188873	189616	192403
00:24:00	37	38626	40055	40774	49011	50428	48963	38898	40390	41812	211707	209735	211858	69065	70471	70168	82749	84085	82655	70189	71531	69831	191420	192973	194303	137436	138858	138576	192671	193530	191362	198900	199835	197183	194780	195865	198481
00:26:00	37	38579	40051	40749	49024	50471	48991	39198	40554	42043	214389	211942	214304	71167	72312	72138	85433	86751	85330	72541	73870	72177	195438	196698	198174	144237	145097	145095	196456	197325	195152	202843	203867	201171	200241	201695	204127
00:28:00	37	38584	40044	40748	49014	50551	49026	39252	40738	42163	215884	213726	215943	72507	74047	73677	87960	89258	87847	74814	76054	74404	199298	199812	201660	150293	151025	151086	199464	200914	198451	206215	207406	204626	205998	207060	209688
00:30:00	37	38534	40022	40712	49068	50613	49084	39326	40906	42285	217237	215151	217332	74428	75629	75427	90300	91667	90222	76735	78072	76375	201650	202615	204238	155056	156508	156211	202423	204185	201567	209620	210485	207868	211217	212058	214796
00:32:00	37	38532	40017	40709	49271	50685	49221	39653	41040	42514	219031	216804	219055	75703	77009	76755	92484	93922	92442	78624	79898	78231	203891	205086	206595	160736	161502	161547	206191	207291	205003	212088	213166	210443	215700	216836	219427
00:34:00	37	38514	40007	40694	49321	50765	49286	39735	41239	42655	220543	218149	220484	76973	78376	78074	94793	96032	94651	80283	81581	79903	205433	207203	208425	164853	166262	165986	209025	210165	207857	214294	215592	212759	219768	221334	223711
00:36:00	37	38556	40022	40723	49385	50830	49351	39871	41433	42821	221390	219559	221611	78070	79576	79223	96710	98051	96619	81667	83073	81341	207795	209235	210621	169208	170688	170377	211989	212929	210721	216250	217748	214815	224130	225617	228033
00:38:00	37	38532	40030	40715	49415	50822	49361	40247	41644	43112	223479	220964	223360	79340	80778	80458	98510	99959	98473	83232	84455	82814	209882	210987	212540	174090	174606	174775	213833	215303	212830	218344	219786	216881	228492	229614	232212
00:40:00	37	38611	40046	40762	49395	50845	49363	40294	41838	43234	224436	222359	224535	80429	81862	81545	100394	101626	100248	84192	85760	83948	211811	212773	214398	177187	178241	178142	216242	217602	215184	220397	221770	218900	232629	233377	236162
00:42:00	37	38571	40052	40745	49227	50788	49251	40708	42050	43545	225580	223386	225621	81711	82872	82690	102023	103199	101849	85534	86941	85208	212648	214331	215596	180329	181589	181387	218062	219619	217103	222281	223542	220728	235685	236757	239380
00:44:00	37	38593	40062	40761	49440	50764	49345	40703	42211	43625	226813	224579	226834	82397	83794	83494	103127	104696	103150	86809	88087	86418	214366	215627	217103	183027	184513	184198	220520	221580	219312	224214	225086	222466	238586	239895	242399
00:46:00	37	38588	40052	40754	49096	50762	49174	40933	42350	43809	227995	225865	228067	83120	84704	84312	104575	106082	104567	87572	89208	87362	215581	217071	218432	185946	187270	187036	222073	223365	220981	225111	226522	223633	241027	242757	245052
00:48:00	37	38581	40064	40757	49299	50790	49288	41054	42477	43933	229404	227185	229432	83947	85541	85144	105994	107465	105968	88963	90298	88601	216366	218548	219565	188709	189800	189682	223637	224991	222576	226064	228035	224867	244184	245606	248054
00:50:00	37	38564	40054	40743	49383	50773	49321	40988	42620	43973	230523	228207	230503	84979	86341	86059	107326	108822	107313	89797	91275	89507	219028	219997	221618	190972	192104	191966	225167	226398	224044	227576	229423	226316	246939	248244	250750
00:52:00	37	38631	40046	40772	49368	50834	49344	41344	42771	44225	231080	229003	231179	85896	87106	86899	108937	110102	108757	90983	92257	90590	220033	220948	222596	192980	194317	194077	226195	227807	225263	229844	230718	228096	249930	250794	253520
00:54:00	37	38539	40049	40728	49353	50680	49259	41418	42891	44322	232182	229993	232225	86398	87858	87527	109915	111383	109887	91696	93144	91391	221612	222142	223982	194550	196244	195826	227552	229260	226669	231154	231983	229384	251775	253106	255600
00:56:00	37	38551	40068	40744	49403	50559	49222	41688	43092	44557	233523	231302	233550	86945	88497	88121	110975	112614	111033	92481	94003	92213	220337	223182	223869	197008	198180	198022	229119	230692	228168	231587	233161	230190	253775	255221	257657
00:58:00	37	38593	40050	40755	48526	50445	48733	41651	43266	44627	234694	232455	234712	87705	89104	88803	112396	113738	112305	93400	94788	93065	222333	224041	225294	198343	200039	199620	230904	232146	229787	232387	234036	231028	255748	256994	259530
01:00:00	37	38663	40045	40787	48779	50339	48803	41995	43455	44892	235556	233363	235597	88178	89663	89320	113481	114865	113411	94088	95533	93781	224229	224561	226500	200652	201829	201668	232325	233469	231159	233469	234903	232002	257511	258645	261237
01:02:00	37	38537	40065	40736	48801	50212	48750	42211	43607	45076	236450	234420	236572	88931	90271	90000	114560	116055	114546	94910	96270	94560	224328	225730	227135	202279	203585	203360	233464	234663	232325	234219	235939	232895	258796	260197	262655
01:04:00	37	38514	40079	40731	48823	50279	48795	42364	43802	45250	237658	235036	237486	89193	90807	90400	115550	117221	115624	95422	96974	95169	224214	226631	227531	203497	205227	204791	234167	235720	233206	235489	237018	234070	260031	261699	264024
01:06:00	37	38655	40069	40796	48766	50303	48779	42448	43942	45363	237506	235861	237820	89985	91355	91069	116922	118373	116886	96163	97643	95874	226180	227267	228829	205787	206798	206720	235088	236663	234138	236764	237873	235134	261534	263182	265517
01:08:00	37	38663	40082	40806	48863	50360	48855	42626	44088	45524	239267	236659	239102	90382	91870	91525	118227	119434	118068	96923	98288	96576	226841	228130	229592	206555	208061	207737	236192	237517	235116	237784	238667	236041	263257	264743	267159
01:10:00	37	38613	40120	40801	48898	50371	48878	42698	44228	45631	239758	237740	239886	90921	92460	92090	119239	120531	119123	97430	98937	97155	227406	229072	230346	208506	209693	209528	237041	238493	236029	237742	239321	236348	264928	266171	268708
01:12:00	37	38598	40102	40784	49086	50409	48990	42941	44363	45819	240574	238241	240545	91506	92974	92639	119866	121517	119930	98138	99564	97822	228646	229718	231288	208597	211094	210276	237732	239548	236903	238190	239919	236871	266599	267514	270215
01:14:00	37	38705	40103	40837	48875	50450	48907	43062	44498	45947	241206	239259	241369	92142	93510	93224	121037	122364	120938	98668	100190	98400	228923	230464	231800	211657	212481	212496	239049	240539	238056	238762	240548	237472	267174	268650	271071
01:16:00	37	38564	40111	40772	48957	50497	48971	43122	44649	46053	242722	240228	242613	92555	94042	93698	121849	123162	121743	99297	100837	99038	229411	231151	232388	212789	213887	213766	240359	241382	239132	239750	241336	238359	268246	269730	272147
01:18:00	37	38670	40129	40833	49068	50472	49013	43300	44793	46214	243259	241346	243439	93060	94500	94179	122465	124113	122528	100052	101445	99719	230570	231861	233322	213489	215465	214906	241149	242231	239952	240931	242112	239337	268939	270561	272909
01:20:00	37	38655	40132	40828	49135	50541	49081	43456	44961	46376	244412	241855	244272	93583	94964	94672	123230	124989	123349	100666	102127	100367	230842	232406	233730	215539	216517	216456	241257	243060	240421	241681	242794	240053	270328	271452	274049
01:22:00	37	38685	40181	40867	48959	50549	48998	43661	45102	46548	244446	242669	244694	93796	95404	94999	124621	125733	124414	101176	102755	100937	232196	233039	234723	216487	217648	217495	241978	243907	241206	242072	243445	240575	270754	272360	274716
01:24:00	37	38722	40187	40888	49222	50569	49138	43901	45246	46740	245811	243235	245661	94462	95828	95544	125416	126545	125218	102077	103323	101670	231644	233470	234664	216918	218822	218299	243191	244754	242235	242169	244055	240929	271628	273332	275639
01:26:00	37	38809	40186	40930	48997	50591	49038	43825	45393	46777	246042	244109	246212	94754	96198	95875	125567	127573	125810	102441	103920	102151	232577	234073	235431	218443	219915	219607	244597	245714	243417	243008	244645	241643	272786	274279	276691
01:28:00	37	38700	40198	40883	49165	50641	49147	44023	45531	46944	247080	244759	247057	95182	96597	96288	126525	128326	126665	102889	104518	102674	232726	234488	235714	219359	221016	220616	245382	246534	244220	243978	245200	242405	273799	275199	277658
01:30:00	37	38648	40240	40879	49247	50656	49194	44191	45634	47079	247769	245563	247803	95432	96978	96604	128370	128969	127906	103654	105007	103301	233857	235096	236583	221003	222408	222134	246056	247184	244882	244634	245950	243108	275062	276090	278735
01:32:00	37	38747	40231	40923	49210	50726	49212	44350	45791	47237	248389	246289	248476	95791	97378	96984	128387	129852	128357	104162	105601	103852	234273	235679	237082	221991	223483	223165	246080	247739	245172	244845	246725	243602	275356	276844	279259
01:34:00	37	38933	40224	41011	49296	50752	49267	44414	45943	47346	249309	246981	249283	96366	97742	97452	128630	130569	128839	104523	106159	104312	234684	236123	237510	223878	224623	224678	246442	248346	245657	245922	247361	244457	276084	277554	279978
01:36:00	37	38764	40242	40937	49348	50808	49321	44612	46090	47518	249752	247598	249812	96754	98104	97827	129982	131023	129740	105412	106681	105016	235489	236447	238073	223818	225840	225258	247370	249041	246468	246880	247820	245165	276555	278167	280520
01:38:00	37	38665	40277	40906	49296	50860	49322	44785	46247	47683	250460	248428	250581	97002	98513	98156	130113	131535	130062	105677	107227	105423	234949	236715	237939	225061	227043	226481	248417	249884	247413	247157	248394	245591	277347	278691	281178
01:40:00	37	38737	40251	40928	49526	50903	49457	44924	46401	47830	251663	249157	251548	97242	98867	98454	130638	132314	130715	106264	107815	106010	235474	237153	238420	227086	228052	227997	249529	250801	248427	246929	248856	245710	278129	279126	281786
01:42:00	37	38923	40264	41026	49467	50929	49441	45137	46564	48017	251657	249618	251775	97836	99257	98945	130945	132990	131207	106895	108354	106595	235613	237451	238639	228007	229042	228952	250299	251719	249271	247717	249290	246320	277976	279470	281882
01:44:00	37	38801	40281	40975	49514	50943	49472	45184	46705	48112	252333	250324	252466	98138	99670	99303	132529	133710	132357	107462	108910	107157	236873	237999	239542	228923	229962	229870	251027	252544	250048	248234	249699	246783	278260	279775	282177
01:46:00	37	38831	40278	40988	49477	50958	49461	45424	46867	48312	253724	251161	253581	98700	100095	99796	133358	134561	133197	108108	109446	107747	236979	238514	239853	228767	231078	230353	251958	253255	250868	249046	250247	247462	278273	279983	282287
01:48:00	37	38749	40242	40929	49368	50963	49410	45491	46983	48404	253661	251698	253816	99067	100415	100139	133713	135343	133766	108457	109976	108187	237692	239188	240546	229663	231791	231156	252542	253803	251434	249205	250709	247773	278872	280369	282779
01:50:00	37	38722	40234	40912	49598	50971	49527	45734	47133	48600	254235	251962	254236	99371	100781	100474	134893	135976	134671	108945	110466	108676	238049	239621	240941	232667	232547	233034	253082	254313	251959	249668	251281	248291	279169	280788	283137
01:52:00	37	38740	40217	40913	49492	50978	49479	45719	47247	48650	254793	252633	254850	99435	101079	100656	134856	136519	134926	109544	110921	109203	238982	240072	241633	231570	233434	232931	253042	254652	252109	250027	251835	248747	279904	281345	283783
01:54:00	37	38762	40225	40927	49556	51016	49529	45932	47384	48824	255553	253315	255571	99965	101400	101081	135693	137172	135671	109910	111510	109681	239037	240564	241907	232704	234488	234025	253577	255056	252579	251094	252460	249593	280355	281965	284319
01:56:00	37	38749	40232	40924	49512	51030	49515	45994	47487	48907	256295	254205	256387	100193	101723	101357	136077	137665	136109	110383	111991	110158	239235	241148	242299	233199	235296	234677	253654	255602	252891	251814	253040	250243	281060	282429	284903
01:58:00	37	38787	40238	40946	49556	51065	49554	46174	47617	49062	257269	254848	257196	100671	102103	101786	136978	138293	136873	111403	112501	110921	240153	241658	243011	234937	236547	236170	254560	256255	253670	252334	253672	250819	281972	282908	285598
02:00:00	37	38757	40244	40934	49668	51100	49627	46249	47747	49165	257470	255365	257555	100985	102484	102133	137354	138921	137376	111349	113011	111151	240970	242167	243674	236707	237798	237680	255813	256907	254622	252567	254304	251252	281489	283386	285597

## Sheet: Figure 5b
Time(h:mm:ss)	T° 485/20,528/20	A=no B=no C=no	A=no B=no C=no	A=no B=no C=no	A=1 B=no,C=no	A=1 B=no,C=no	A=1 B=no,C=no	A=no,B=1,C=no	A=no,B=1,C=no	A=no,B=1,C=no	A=no,B=no,C=1	A=no,B=no,C=1	A=no,B=no,C=1	A=0,B=0,C=0	A=0,B=0,C=0	A=0,B=0,C=0	A=1,B=0,C=0	A=1,B=0,C=0	A=1,B=0,C=0	A=0,B=1,C=0	A=0,B=1,C=0	A=0,B=1,C=0	A=0,B=0,C=1	A=0,B=0,C=1	A=0,B=0,C=1	A=1,B=1,C=0	A=1,B=1,C=0	A=1,B=1,C=0	A=1,B=0,C=1	A=1,B=0,C=1	A=1,B=0,C=1	A=0,B=1,C=1	A=0,B=1,C=1	A=0,B=1,C=1	A=1,B=1,C=1	A=1,B=1,C=1	A=1,B=1,C=1
00:00:00	37	23635	22228	22942	26258	23756	25038	24973	22699	23863	24857	23261	24072	23997	21679	22867	23246	21684	22479	23667	22029	22862	25902	24323	25125	23825	21482	22684	24509	22320	23440	26623	24145	25414	23739	22626	21456
00:02:00	37	23493	22146	22829	26263	25667	25967	25386	24666	25029	24985	23933	24465	24249	23672	23962	24567	23297	23940	24486	23288	23894	26656	25606	26136	24526	23614	24074	28959	28003	28485	28843	28031	28440	30181	29730	29273
00:04:00	37	23391	22064	22737	27801	27578	27690	27177	26633	26906	25899	24605	25260	26374	25665	26022	26082	24910	25503	25623	24547	25091	28236	26889	27571	26066	25746	25907	34232	33687	33960	32174	31917	32046	37542	37317	37090
00:06:00	37	23330	22003	22676	30914	29345	30140	29928	28597	29270	26817	25210	26026	28908	27922	28419	27792	26621	27213	27175	25813	26503	29680	28035	28869	28801	28149	28477	40326	39781	40055	36614	36359	36487	45817	45592	45365
00:08:00	37	23308	22002	22665	33487	31297	32410	32536	30776	31668	27300	25913	26615	31633	30998	31317	29699	28519	29115	28618	27159	27898	30806	29244	30035	32348	30965	31664	47243	46854	47049	42168	41988	42078	55008	54867	54726
00:10:00	37	23326	22048	22696	35095	33085	34105	34791	32792	33806	27885	26527	27214	35280	34572	34928	31798	30603	31206	30000	28655	29335	31633	30447	31046	35837	33991	34926	54982	54816	54899	48832	48786	48809	65113	65077	65041
00:12:00	37	23491	22124	22818	36022	34366	35204	36285	34422	35366	28497	27080	27798	39632	38529	39084	34060	32879	33475	31214	30319	30770	32702	31766	32237	38609	37006	37816	64322	63540	63932	56989	56700	56845	76983	76599	76212
00:14:00	37	23618	22217	22928	36744	35200	35980	37257	35669	36472	28970	27610	28298	44242	42794	43524	36503	35376	35944	33102	32294	32700	34251	33313	33785	41196	40033	40619	74044	72911	73480	66164	65644	65905	89118	88652	88183
00:16:00	37	23714	22316	23026	37317	35786	36560	38076	36571	37331	29585	28131	28867	48691	47026	47866	39168	38152	38663	35494	34660	35079	36271	35255	35767	43873	43116	43496	83943	82796	83371	76181	75478	75830	101675	101229	100781
00:18:00	37	23769	22392	23091	37658	36278	36974	38771	37247	38017	29947	28604	29283	52962	51024	52002	42186	41224	41708	38493	37531	38015	38543	37554	38052	47487	46470	46981	94099	92793	93448	86891	85860	86377	114861	114220	113576
00:20:00	37	23825	22451	23148	38024	36701	37368	39303	37828	38573	30492	29062	29786	56439	54675	55564	45678	44581	45133	41831	40846	41341	41345	40095	40725	51250	50216	50736	104406	102669	103541	97998	96526	97265	128103	127216	126323
00:22:00	37	23871	22495	23193	38481	37026	37761	39665	38283	38980	30859	29488	30181	59620	57875	58754	49422	48168	48799	45569	44479	45027	44195	42723	43465	55379	54360	54872	114309	112246	113282	108899	107197	108051	140959	139843	138718
00:24:00	37	23911	22533	23232	38860	37370	38122	40161	38674	39425	31262	29932	30604	62498	60629	61571	53287	51876	52586	49677	48216	48952	46956	45405	46187	59928	58642	59289	123424	121315	122374	119496	117544	118524	152850	151648	150436
00:26:00	37	23936	22558	23257	38943	37642	38298	40351	39044	39703	31717	30355	31043	64693	63073	63888	57103	55565	56339	53660	51962	52818	49411	47955	48689	64591	63077	63839	131826	129693	130764	129536	127357	128451	163654	162468	161274
00:28:00	37	23957	22572	23275	39375	37879	38634	40725	39382	40059	32165	30779	31480	66730	65243	65991	60726	59129	59933	57179	55603	56396	51952	50335	51150	68899	67460	68183	139446	137343	138398	138628	136547	137591	173450	172270	171082
00:30:00	37	23948	22573	23271	39384	38076	38736	41154	39643	40405	32605	31217	31919	68660	67099	67884	64120	62488	63309	60559	59002	59785	54098	52587	53348	73425	71711	72573	146297	144298	145301	147062	145042	146055	182293	181088	179874
00:32:00	37	23943	22563	23263	39667	38287	38983	41353	39939	40652	32981	31635	32315	70469	68776	69627	67242	65592	66422	63774	62098	62941	56095	54711	55407	77292	75693	76497	152556	150616	151589	154848	152835	153845	189997	188871	187738
00:34:00	37	23915	22541	23238	39848	38460	39160	41465	40165	40820	33452	32087	32777	71780	70308	71048	70082	68428	69260	66672	64995	65839	58212	56618	57421	81182	79450	80320	158198	156346	157275	161970	160009	160992	196811	195765	194713
00:36:00	37	23888	22517	23213	39996	38652	39330	41834	40339	41093	33807	32508	33164	73074	71684	72382	72624	71008	71821	69140	67632	68390	60031	58448	59245	84504	82844	83678	163419	161577	162501	168504	166608	167558	202974	201932	200884
00:38:00	37	23844	22490	23177	40242	38858	39556	41854	40552	41208	34424	32905	33673	74394	72882	73642	74909	73333	74125	71666	69977	70827	61489	60138	60817	87680	85942	86815	168094	166365	167232	174496	172676	173588	208324	207363	206398
00:40:00	37	23830	22468	23159	40342	39025	39689	42024	40739	41386	34709	33336	34029	75536	74046	74795	77020	75417	76223	73743	72067	72910	63247	61675	62466	90396	88714	89559	172455	170740	171599	180055	178294	179176	213147	212212	211273
00:42:00	37	23809	22452	23140	40695	39194	39952	42416	40929	41679	34967	33712	34345	76461	75085	75776	78867	77297	78086	75499	73965	74736	64548	63048	63802	92781	91233	92010	176496	174757	175629	185188	183497	184344	217568	216590	215607
00:44:00	37	23804	22444	23134	40683	39345	40019	42402	41123	41767	35607	34086	34855	77598	76015	76811	80502	78983	79746	77123	75644	76387	65896	64391	65148	95043	93470	94260	180069	178448	179260	190060	188322	189193	221187	220347	219504
00:46:00	37	23806	22439	23133	40845	39485	40171	42782	41315	42055	35688	34466	35082	78273	76846	77563	82020	80493	81260	78628	77157	77896	66893	65620	66259	97098	95470	96287	183507	181865	182688	194521	192803	193664	224644	223836	223026
00:48:00	37	23806	22440	23133	40994	39587	40297	42826	41442	42140	36294	34850	35579	79043	77638	78343	83342	81864	82606	80064	78532	79302	68208	66735	67476	98868	97262	98068	186546	185018	185784	198622	196943	197784	227808	226994	226177
00:50:00	37	23806	22440	23355	41045	39707	40403	42982	41589	42522	36609	35183	36138	79688	78306	79232	84567	83117	84089	81307	79789	80806	69389	67863	68885	100393	98889	99897	189540	187962	189019	202459	200716	201884	230756	230203	229080
00:52:00	37	23811	22441	23359	41205	39825	40550	43054	41715	42612	36885	35573	36452	80421	78987	79948	85724	84259	85241	82375	80875	81880	70126	68892	69719	101743	100357	101286	192264	190727	191757	205886	204190	205326	233324	232796	231723
00:54:00	37	23806	22445	23357	41279	39925	40632	43135	41858	42713	37275	35925	36830	80941	79629	80508	86768	85323	86291	83407	81845	82892	71535	69854	70980	103179	101649	102674	194788	193329	194306	208927	207376	208415	235702	235164	234073
00:56:00	37	23813	22447	23362	41437	40043	40777	43411	41991	42942	37637	36267	37185	81676	80234	81200	87731	86319	87265	84059	82721	83617	72035	70742	71608	104438	102743	103879	197333	195747	196810	211889	210283	211359	237860	237305	236179
00:58:00	37	23823	22447	23369	41493	40148	40849	43541	42137	43078	38055	36602	37576	82254	80806	81776	88661	87244	88193	84912	83524	84454	73018	71648	72566	105329	103756	104810	199553	198008	199043	214555	212961	214029	239558	239065	238064
01:00:00	37	23816	22448	23364	41636	40256	40981	43648	42285	43198	38319	36938	37863	82711	81376	82270	89547	88104	89071	85685	84222	85202	73832	72439	73372	105863	104653	105464	201631	200084	201120	216993	215440	216481	241288	240772	239724
01:02:00	37	23813	22444	23361	41729	40340	41071	43785	42403	43329	38560	37265	38133	83282	81864	82814	90348	88902	89871	86390	84922	85905	74656	73254	74193	106804	105452	106358	203568	201978	203043	219276	217716	218761	242748	242230	241177
01:04:00	37	23809	22438	23356	41820	40420	41158	43875	42510	43425	38955	37566	38497	83792	82289	83296	91067	89627	90592	86898	85558	86456	75490	74016	75003	107667	106172	107174	205169	203709	204687	221322	219875	220845	244003	243506	242498
01:06:00	37	23795	22430	23345	41857	40478	41202	44000	42607	43540	39270	37850	38801	84114	82716	83653	91721	90276	91244	87559	86091	87074	76110	74786	75673	108433	106876	107919	206804	205344	206322	223270	221880	222811	245123	244643	243669
01:08:00	37	23790	22420	23338	41894	40573	41258	44079	42710	43627	39560	38162	39099	84381	83118	83964	92287	90868	91819	88093	86572	87591	76825	75507	76390	108927	107496	108455	208210	206864	207766	225351	223706	224808	246165	245695	244741
01:10:00	37	23779	22407	23326	41924	40646	41302	44130	42793	43689	39741	38448	39314	84845	83509	84404	92793	91399	92333	88348	87081	87930	77682	76210	77196	109382	108064	108947	209804	208334	209319	227017	225394	226481	247139	246681	245750
01:12:00	37	23760	22401	23312	42205	40719	41514	44300	42881	43832	40117	38704	39651	85291	83862	84820	93306	91889	92839	88796	87577	88394	78264	76919	77820	109906	108577	109467	211166	209749	210699	228404	226921	227915	248109	247645	246703
01:14:00	37	23748	22401	23304	42184	40836	41539	44293	43008	43869	40386	38986	39924	85750	84251	85255	93723	92350	93270	89445	87984	88963	79006	77574	78533	110507	109018	110016	212520	211143	212066	229764	228235	229259	249048	248556	247558
01:16:00	37	23765	22403	23316	42221	40936	41597	44436	43114	44000	40551	39267	40127	85880	84606	85460	94173	92795	93718	90039	88407	89500	79654	78179	79167	110996	109388	110465	213882	212426	213402	230903	229436	230419	249890	249376	248331
01:18:00	37	23790	22409	23334	42479	40994	41789	44717	43207	44219	40968	39508	40486	86323	84963	85874	94591	93223	94140	90127	88842	89703	80099	78805	79672	111136	109615	110634	215177	213671	214680	231923	230620	231493	250438	249987	249072
01:20:00	37	23788	22417	23336	42425	41048	41770	44659	43327	44220	41147	39793	40700	86622	85238	86165	95018	93647	94566	90461	89176	90037	80708	79410	80280	111228	109917	110795	216221	214856	215771	233023	231726	232595	251006	250598	249770
01:22:00	37	23790	22422	23338	42495	41109	41838	44766	43428	44324	41321	40079	40911	87075	85549	86571	95447	94058	94988	90972	89492	90484	81395	80040	80948	111043	110056	110717	217392	215943	216914	234324	232772	233812	251813	251343	250388
01:24:00	37	23788	22420	23337	42453	41122	41814	44893	43488	44429	41815	40343	41329	87123	85833	86697	95843	94447	95382	91118	89871	90706	82030	80678	81584	112017	110342	111464	218443	216944	217948	235294	233791	234798	252539	252031	250998
01:26:00	37	23788	22418	23336	42530	41171	41882	44940	43578	44491	41977	40612	41527	87436	86098	86995	96224	94816	95759	91619	90227	91160	82804	81305	82309	111692	110597	111331	219315	217910	218851	236129	234761	235677	252978	252523	251598
01:28:00	37	23783	22413	23331	42543	41251	41917	45019	43649	44567	42291	40882	41826	87743	86367	87289	96537	95162	96083	92018	90488	91513	83289	81900	82831	112567	110940	112030	220185	218808	219731	237020	235625	236560	253491	253044	252137
01:30:00	37	23776	22407	23324	42669	41337	42029	45107	43748	44659	42492	41107	42035	87949	86644	87518	96866	95488	96411	92241	90781	91759	83842	82471	83390	112502	111235	112084	221050	219656	220590	237871	236436	237397	254006	253551	252629
01:32:00	37	23767	22397	23315	42894	41401	42201	45121	43818	44691	42671	41368	42241	88420	86935	87930	97177	95792	96720	92280	91020	91864	84370	83023	83925	112759	111541	112357	221883	220482	221421	238648	237204	238171	254507	254052	253128
01:34:00	37	23755	22384	23303	42884	41475	42219	45388	43876	44889	42938	41588	42493	88506	87236	88087	97470	96086	97013	92584	91269	92150	84884	83556	84446	113490	111686	112895	222681	221279	222218	239347	237903	238870	254996	254541	253618
01:36:00	37	23739	22370	23287	42852	41519	42212	45288	43934	44841	43281	41829	42802	88891	87544	88446	97746	96371	97292	92814	91526	92389	85565	84098	85081	113223	111891	112783	223444	222060	222987	239968	238563	239504	255474	255021	254101
01:38:00	37	23718	22355	23268	42910	41563	42265	45313	43992	44877	43393	42070	42957	89250	87851	88788	98005	96655	97560	93261	91784	92774	85953	84639	85519	113293	112096	112898	224173	222841	223733	240514	239224	240088	255940	255493	254585

## Sheet: Figure 5c
	AND
	A=n, B=n			A=0, B=0			A=0, B=1			A=1, B=0			A=1, B=1
	8364	8325	8373	37416	37342	37287	46355	46406	46276	47099	47046	47159	83925	83914	83857
	8282	8329	8334	37412	37468	37348	46322	46237	46175	47170	47183	47263	83903	83929	83853
	8351	8308	8358	37434	37414	37332	46303	46364	46229	47179	47231	47291	83840	83813	83764			Note: The data comes from last five values of Figure 2c, Figure 2e, Figure 5a and Figure 5b.
	8288	8304	8324	37395	37408	37310	46356	46316	46231	47095	47060	47164	83771	83789	83717
	8314	8313	8342	37447	37444	37354	46320	46330	46220	47142	47151	47233	83769	83764	83704
	OR
	A=n, B=n			A=0, B=0			A=0, B=1			A=1, B=0			A=1, B=1
	8364	8271	8454	30958	30856	31029	75572	75523	75750	74896	74856	75090	77179	77099	77294
	8282	8232	8458	30899	30837	31050	75593	75491	75664	74952	74853	75028	77248	77169	77364
	8351	8256	8437	30893	30827	31036	75470	75441	75688	74841	74757	74949	77306	77259	77487
	8288	8223	8433	30950	30858	31041	75635	75515	75671	74798	74804	75085	77492	77370	77522
	8314	8241	8442	30918	30853	31064	75485	75428	75646	75308	75197	75361	77344	77291	77514
	AND-OR
	A=no B=no C=no			A=1 B=no,C=no			A=no,B=1,C=no			A=no, B=no, C=1			A=0,B=0,C=0			A=1,B=0,C=0			A=0,B=1,C=0			A=0,B=0,C=1			A=1,B=1,C=0			A=1,B=0,C=1			A=0,B=1,C=1			A=1,B=1,C=1
	38740	40217	40913	49492	50978	49479	45719	47247	48650	254793	252633	254850	99435	101079	100656	134856	136519	134926	109544	110921	109203	238982	240072	241633	231570	233434	232931	253042	254652	252109	250027	251835	248747	279904	281345	283783
	38762	40225	40927	49556	51016	49529	45932	47384	48824	255553	253315	255571	99965	101400	101081	135693	137172	135671	109910	111510	109681	239037	240564	241907	232704	234488	234025	253577	255056	252579	251094	252460	249593	280355	281965	284319
	38749	40232	40924	49512	51030	49515	45994	47487	48907	256295	254205	256387	100193	101723	101357	136077	137665	136109	110383	111991	110158	239235	241148	242299	233199	235296	234677	253654	255602	252891	251814	253040	250243	281060	282429	284903
	38787	40238	40946	49556	51065	49554	46174	47617	49062	257269	254848	257196	100671	102103	101786	136978	138293	136873	111403	112501	110921	240153	241658	243011	234937	236547	236170	254560	256255	253670	252334	253672	250819	281972	282908	285598
	38757	40244	40934	49668	51100	49627	46249	47747	49165	257470	255365	257555	100985	102484	102133	137354	138921	137376	111349	113011	111151	240970	242167	243674	236707	237798	237680	255813	256907	254622	252567	254304	251252	281489	283386	285597
	OR-AND
	A=no B=no C=no			A=1 B=no,C=no			A=no,B=1,C=no			A=no, B=no, C=1			A=0,B=0,C=0			A=1,B=0,C=0			A=0,B=1,C=0			A=0,B=0,C=1			A=1,B=1,C=0			A=1,B=0,C=1			A=0,B=1,C=1			A=1,B=1,C=1
	23776	22407	23324	42669	41337	42029	45107	43748	44659	42492	41107	42035	87949	86644	87518	96866	95488	96411	92241	90781	91759	83842	82471	83390	112502	111235	112084	221050	219656	220590	237871	236436	237397	254006	253551	252629
	23767	22397	23315	42894	41401	42201	45121	43818	44691	42671	41368	42241	88420	86935	87930	97177	95792	96720	92280	91020	91864	84370	83023	83925	112759	111541	112357	221883	220482	221421	238648	237204	238171	254507	254052	253128
	23755	22384	23303	42884	41475	42219	45388	43876	44889	42938	41588	42493	88506	87236	88087	97470	96086	97013	92584	91269	92150	84884	83556	84446	113490	111686	112895	222681	221279	222218	239347	237903	238870	254996	254541	253618
	23739	22370	23287	42852	41519	42212	45288	43934	44841	43281	41829	42802	88891	87544	88446	97746	96371	97292	92814	91526	92389	85565	84098	85081	113223	111891	112783	223444	222060	222987	239968	238563	239504	255474	255021	254101
	23718	22355	23268	42910	41563	42265	45313	43992	44877	43393	42070	42957	89250	87851	88788	98005	96655	97560	93261	91784	92774	85953	84639	85519	113293	112096	112898	224173	222841	223733	240514	239224	240088	255940	255493	254585

[truncated: 12 more sheets: Figure 6b, Figure S4a, Figure S4b, Figure S6a, Figure S6b, Figure S6c, Figure S7a, Figure S7b, Figure S9a, Figure S9b, Figure S10a, Figure S10b]
