# Supplementary material for: Refined design of a DNA logic gate for implementing a DNA-based three-level circuit
Source: Royal Society of Chemistry journal article supplement (doi:10.1039/d4nr03606a), 2024-11-06
Supplement: d4nr03606a2.xlsx [file d4nr03606a2.xlsx]

## Sheet: Figure 5c note
	AND
	A=n, B=n			A=0, B=0			A=0, B=1			A=1, B=0			A=1, B=1				Note: The data comes from last five values of Figure 2c, Figure 2e, Figure 5a and Figure 5b. For each circuit, we find its minimum, maximum and average values. Then we normallizing it by formula "(average-min)/(max-min)".
	8364	8325	8373	37416	37342	37287	46355	46406	46276	47099	47046	47159	83925	83914	83857
	8282	8329	8334	37412	37468	37348	46322	46237	46175	47170	47183	47263	83903	83929	83853
	8351	8308	8358	37434	37414	37332	46303	46364	46229	47179	47231	47291	83840	83813	83764
	8288	8304	8324	37395	37408	37310	46356	46316	46231	47095	47060	47164	83771	83789	83717
	8314	8313	8342	37447	37444	37354	46320	46330	46220	47142	47151	47233	83769	83764	83704
min(B3: P7)	8282			8282			8282			8282			8282
max(B3: P7)	83929			83929			83929			83929			83929
average	8327.27			37387.4			46296			47164.4			83820.8
(average-min)/(max-min)	0.000598393			0.384753			0.502518			0.513998			0.99857
average (Relative error)	8327(±0.54%)			37387(±0.27%)			46296(±0.26%)			47164(±0.25%)			83821(±0.14%)
	OR
	A=n, B=n			A=0, B=0			A=0, B=1			A=1, B=0			A=1, B=1
	8364	8271	8454	30958	30856	31029	75572	75523	75750	74896	74856	75090	77179	77099	77294
	8282	8232	8458	30899	30837	31050	75593	75491	75664	74952	74853	75028	77248	77169	77364
	8351	8256	8437	30893	30827	31036	75470	75441	75688	74841	74757	74949	77306	77259	77487
	8288	8223	8433	30950	30858	31041	75635	75515	75671	74798	74804	75085	77492	77370	77522
	8314	8241	8442	30918	30853	31064	75485	75428	75646	75308	75197	75361	77344	77291	77514
min(B15: P19)	8223			8223			8223			8223			8223
max(B15: P19)	77522			77522			77522			77522			77522
average	8336.4			30937.9			75571.5			74985			77329.2
(average-min)/(max-min)	0.00163639			0.327782			0.971853			0.963391			0.997218
average (Relative error)	8336(±1.36%)			30938(±0.36%)			75571(±0.19%)			74985(±0.3%)			77329(±0.3%)
	AND-OR
	A=no B=no C=no			A=1 B=no,C=no			A=no,B=1,C=no			A=no, B=no, C=1			A=0,B=0,C=0			A=1,B=0,C=0			A=0,B=1,C=0			A=0,B=0,C=1			A=0,B=1,C=1			A=1,B=0,C=1			A=1,B=1,C=0			A=1,B=1,C=1
	38740	40217	40913	49492	50978	49479	45719	47247	48650	254793	252633	254850	99435	101079	100656	134856	136519	134926	109544	110921	109203	238982	240072	241633	250027	251835	248747	253042	254652	252109	231570	233434	232931	279904	281345	283783
	38762	40225	40927	49556	51016	49529	45932	47384	48824	255553	253315	255571	99965	101400	101081	135693	137172	135671	109910	111510	109681	239037	240564	241907	251094	252460	249593	253577	255056	252579	232704	234488	234025	280355	281965	284319
	38749	40232	40924	49512	51030	49515	45994	47487	48907	256295	254205	256387	100193	101723	101357	136077	137665	136109	110383	111991	110158	239235	241148	242299	251814	253040	250243	253654	255602	252891	233199	235296	234677	281060	282429	284903
	38787	40238	40946	49556	51065	49554	46174	47617	49062	257269	254848	257196	100671	102103	101786	136978	138293	136873	111403	112501	110921	240153	241658	243011	252334	253672	250819	254560	256255	253670	234937	236547	236170	281972	282908	285598
	38757	40244	40934	49668	51100	49627	46249	47747	49165	257470	255365	257555	100985	102484	102133	137354	138921	137376	111349	113011	111151	240970	242167	243674	252567	254304	251252	255813	256907	254622	236707	237798	237680	281489	283386	285597
min(B27: AK31)	38740			38740			38740			38740			38740			38740			38740			38740			38740			38740			38740			38740
max(B27: AK31)	285598			285598			285598			285598			285598			285598			285598			285598			285598			285598			285598			285598
average	39973			50045.1			47477.2			255554			101137			136699			110909			241101			251587			254333			234811			282734
(average-min)/(max-min)	0.00499477			0.0457961			0.0353936			0.878293			0.252764			0.396823			0.292351			0.819745			0.862223			0.873347			0.794266			0.988399
average (Relative error)	39973(±3.08%)			50045(±1.13%)			47477(±3.7%)			255554(±1.14%)			101137(±1.68%)			136699(±1.35%)			110909(±1.54%)			241101(±0.88%)			251587(±1.13%)			254333(±0.87%)			234811(±1.38%)			282734(±1%)
	OR-AND
	A=no B=no C=no			A=1 B=no,C=no			A=no,B=1,C=no			A=no, B=no, C=1			A=0,B=0,C=0			A=1,B=0,C=0			A=0,B=1,C=0			A=0,B=0,C=1			A=0,B=1,C=1			A=1,B=0,C=1			A=1,B=1,C=0			A=1,B=1,C=1
	23776	22407	23324	42669	41337	42029	45107	43748	44659	42492	41107	42035	87949	86644	87518	96866	95488	96411	92241	90781	91759	83842	82471	83390	237871	236436	237397	221050	219656	220590	112502	111235	112084	254006	253551	252629
	23767	22397	23315	42894	41401	42201	45121	43818	44691	42671	41368	42241	88420	86935	87930	97177	95792	96720	92280	91020	91864	84370	83023	83925	238648	237204	238171	221883	220482	221421	112759	111541	112357	254507	254052	253128
	23755	22384	23303	42884	41475	42219	45388	43876	44889	42938	41588	42493	88506	87236	88087	97470	96086	97013	92584	91269	92150	84884	83556	84446	239347	237903	238870	222681	221279	222218	113490	111686	112895	254996	254541	253618
	23739	22370	23287	42852	41519	42212	45288	43934	44841	43281	41829	42802	88891	87544	88446	97746	96371	97292	92814	91526	92389	85565	84098	85081	239968	238563	239504	223444	222060	222987	113223	111891	112783	255474	255021	254101
	23718	22355	23268	42910	41563	42265	45313	43992	44877	43393	42070	42957	89250	87851	88788	98005	96655	97560	93261	91784	92774	85953	84639	85519	240514	239224	240088	224173	222841	223733	113293	112096	112898	255940	255493	254585
min(B39: AK43)	22355			22355			22355			22355			22355			22355			22355			22355			22355			22355			22355			22355
max(B39: AK43)	255940			255940			255940			255940			255940			255940			255940			255940			255940			255940			255940			255940
average	23144.3			42162			44636.1			42351			87999.7			96843.5			92033.1			84317.5			238647			222033			112449			254376
(average-min)/(max-min)	0.00337921			0.0847957			0.0953877			0.0856048			0.281031			0.318892			0.298299			0.265267			0.925968			0.854842			0.385701			0.993305
average (Relative error)	23144(±3.41%)			42162(±1.96%)			44636(±1.99%)			42351(±2.94%)			88000(±1.54%)			96843(±1.4%)			92033(±1.36%)			84317(±2.19%)			238647(±0.93%)			222033(±1.07%)			112449(±1.08%)			254376(±0.69%)
